# Supplementary material
Source: PubMed Central journal article supplement (PMC4812703)
Supplement: pnas.1521354113.sapp.pdf [file pnas.1521354113.sapp.pdf]

## SUPPORTING METHODS

### Model compartmentalization

The model was partitioned into separate intracellular and extracellular (growth media) compartments to enable experimental parameterization and validation (1). The governing system of differential mass balances,

$$\frac{dC}{dt} = \hat{S} \cdot r_I \quad (1)$$

is on a concentration ( $\text{mol}\cdot\text{vol}^{-1}$ ) basis, where  $C$  represents species concentrations ( $\text{mol}\cdot\text{vol}^{-1}$ ),  $r_I$  is a vector of intensive reaction rates ( $\text{mol}\cdot\text{vol}^{-1}\cdot\text{time}^{-1}$ ), and  $\hat{S}$  is the reaction stoichiometry matrix. Given that concentration is not conserved across regions of unequal volume (*e.g.*, between extracellular and intracellular compartments), entries in the  $\hat{S}$  matrix were scaled depending on species locations to uphold mass conservation. To represent the scaling explicitly, the balance was first rewritten on a mole basis:

$$\frac{dN}{dt} = S \cdot r_E \quad (2)$$

where  $r_E$  are the extensive reaction rates ( $\text{mol}\cdot\text{time}^{-1}$ ),  $N$  represents the number of moles of each species, and  $S$  is the unscaled stoichiometry matrix, all of which are now independent of volume or compartment location. Since reaction rates are generally reported and used in their intensive form ( $\text{mol}\cdot\text{vol}^{-1}\cdot\text{time}^{-1}$ ), the expression was rewritten in terms of  $r_I$ :

$$\frac{dN}{dt} = S \cdot V_{\text{rxn}} \cdot r_I \quad (3)$$

where  $V_{\text{rxn}}$  is a diagonal matrix with entries corresponding to the volume of the compartment in which the reaction occurs ( $V_{\text{cell}}$  for intracellular reactions,  $V_{\text{media}}$  for extracellular reactions, and  $V_{\text{total}}$  for exchange reactions that span the two compartments). Furthermore, because experimental measurements were of species concentrations (*e.g.*,  $[\text{NO}\cdot]$  and  $[\text{O}_2]$ ) and not moles, both sides of the equation were divided by a volume term,  $V_{\text{spec}}$ :

$$V_{\text{spec}}^{-1} \cdot \frac{dN}{dt} = V_{\text{spec}}^{-1} \cdot S \cdot V_{\text{rxn}} \cdot r_I \quad (4)$$

where  $V_{\text{spec}}$  is a diagonal matrix with entries corresponding to the volume of the compartment in which each species exists ( $V_{\text{cell}}$  for intracellular species,  $V_{\text{media}}$  for extracellular species, and  $V_{\text{total}}$  for species that rapidly diffuse across the membrane and exist in both compartments with equal concentration, such as  $\text{NO}\cdot$  and  $\text{O}_2$ ). Moles divided by volume ( $V_{\text{spec}}^{-1} \cdot N$ ) is equivalent to concentration ( $C$ ), and thus the equation becomes:

$$\frac{dC}{dt} = V_{\text{spec}}^{-1} \cdot S \cdot V_{\text{rxn}} \cdot r_I \quad (5)$$

In this form, the right-hand side of the balance is dependent on the absolute volumes of the media and cell compartments ( $V_{\text{media}}$  and  $V_{\text{cell}}$ ), which is undesirable. Instead, the volume terms ( $V_{\text{spec}}$  and  $V_{\text{rxn}}$ ) can be scaled by  $V_{\text{total}}$  such that they are in terms of volume fractions ( $V_{\text{cell}}/V_{\text{total}}$  and  $V_{\text{media}}/V_{\text{total}}$ ), which are easily estimated from the cell density ( $\text{OD}_{600}$ ) of the culture. To perform the scaling, the right-hand side of the equation was multiplied by  $V_{\text{total}}/V_{\text{total}}$ ,

$$\frac{dC}{dt} = \frac{V_{\text{total}}}{V_{\text{total}}} \mathbf{V}_{\text{spec}}^{-1} \cdot \mathbf{S} \cdot \mathbf{V}_{\text{rxn}} \cdot \mathbf{r}_1 \quad (6)$$

and rearranged, using the commutative property of scalar multiplication:

$$\frac{dC}{dt} = V_{\text{total}} \mathbf{V}_{\text{spec}}^{-1} \cdot \mathbf{S} \cdot \frac{\mathbf{V}_{\text{rxn}}}{V_{\text{total}}} \cdot \mathbf{r}_1 \quad (7)$$

The  $V_{\text{total}}$  scalars were multiplied with  $\mathbf{V}_{\text{spec}}$  and  $\mathbf{V}_{\text{rxn}}$  such that the balance could be written in terms of volume fractions ( $\mathbf{F}_{\text{spec}}$  and  $\mathbf{F}_{\text{rxn}}$ , respectively),

$$\frac{dC}{dt} = \mathbf{F}_{\text{spec}}^{-1} \cdot \mathbf{S} \cdot \mathbf{F}_{\text{rxn}} \cdot \mathbf{r}_1 \quad (8)$$

where:

$$\mathbf{F}_{\text{spec}} = \frac{\mathbf{V}_{\text{spec}}}{V_{\text{total}}}, \quad \mathbf{F}_{\text{rxn}} = \frac{\mathbf{V}_{\text{rxn}}}{V_{\text{total}}}, \quad \text{and } \hat{\mathbf{S}} = \mathbf{F}_{\text{spec}}^{-1} \cdot \mathbf{S} \cdot \mathbf{F}_{\text{rxn}} \quad (9)$$

Using this form of the balance (Equation 8), concentrations and reaction rates could be expressed in terms of the relevant compartment volume, without embedding the associated volume fraction into the stoichiometric coefficient matrix.

### MCMC exploration of viable parameter space

An out-of-equilibrium adaptive Metropolis Markov chain Monte Carlo (MCMC) method (2) was employed to identify additional parameter sets exhibiting similar or improved quality of fit (quantified by AIC) compared to the parameter set obtained from the *lsqcurvefit* least-squares optimization. The MCMC method was run in MATLAB using the *MCexp* function from the HYPERSPACE software package (2), with a parameter evaluation limit of 10,000 and a cost function defined as the SSR between simulated and measured concentrations (SSR was scaled by experimental variance if no oscillations were present in the measured  $[\text{NO}\bullet]$  curves). In the event that the MCMC method yielded more optimal (lower SSR) parameter sets such that the initial set exhibited an ER > 10 relative to the new minimum, the MCMC method was repeated, using the new minimum as the initial parameter set.

### Training extracellular parameters

Extracellular model parameters were trained on measurements performed in the bioreactor in the absence of cells. The  $\text{O}_2$  volumetric mass transfer coefficient ( $k_{\text{LAO}_2}$ ) was measured by monitoring  $[\text{O}_2]$  in cell-free media after depleting the  $\text{O}_2$  with an  $\text{N}_2$  flush, as

described previously (3). A line was fit to the  $\ln([O_2]_{\text{sat}} - [O_2])$  vs. time data points, yielding a  $k_{LAO_2}$  of  $1.25 \times 10^{-3} \text{ s}^{-1}$ . The remaining extracellular parameters were determined through an optimization with  $[NO\bullet]$  measurements in cell-free media. Parameters governing  $NO\bullet$  autoxidation ( $k_{NO\bullet-O_2}$ ),  $NO\bullet$  loss to the gas phase ( $k_{LA_{NO\bullet}}$ ), and the rate of  $NO\bullet$  dissociation from DPTA NONOate ( $k_{NONOate,DPTA}$ ) were released to simultaneously fit  $[NO\bullet]$  measured in cell-free MOPS media at 0 and 50  $\mu\text{M } O_2$  following treatment with 50  $\mu\text{M}$  DPTA NONOate. Optimal values were  $k_{NO\bullet-O_2} = 2.40 \times 10^6 \text{ M}^{-2}\text{s}^{-1}$ ,  $k_{LA_{NO\bullet}} = 1.35 \times 10^{-3} \text{ s}^{-1}$ , and  $k_{NONOate,DPTA} = 7.73 \times 10^{-5} \text{ s}^{-1}$ , and yielded  $[NO\bullet]$  profiles in excellent agreement with experimental data (SI Appendix, Fig. S14A). Measurements of pH in *E. coli* cultures at 0  $\mu\text{M } O_2$  revealed that the media was slightly acidified (from 7.4 to 7.2), which was likely the result of mixed-acid fermentation. Therefore, the cell-free  $NO\bullet$  measurement was repeated at 0  $\mu\text{M } O_2$  using pH-adjusted (w/ HCl) cell-free media (pH = 7.2), to replicate the conditions observed in the presence of cells. The value of  $k_{NONOate,DPTA}$  was released (while fixing  $k_{NO\bullet-O_2}$  and  $k_{LA_{NO\bullet}}$ ) to determine the DPTA NONOate release rate under anaerobic conditions. The optimal fit yielded a small increase in  $k_{NONOate,DPTA}$  to  $8.81 \times 10^{-5} \text{ s}^{-1}$ , and exhibited excellent agreement with measured  $[NO\bullet]$  curve (SI Appendix, Fig. S14A).

### Training the respiratory module

Uncertain model parameters involved in the aerobic respiratory chain were optimized to fit the simulated  $[O_2]$  curve to experimental measurements in a culture of exponential-phase *E. coli* grown in an environment of 50  $\mu\text{M } O_2$  (SI Appendix, Fig. S14B and Table S6). These 10 parameters were previously trained on  $[O_2]$  curves (4), but because those measurements were under fully-aerobic (210  $\mu\text{M } O_2$ ) conditions, and involved a centrifugation step immediately prior to inoculation of the cells, they were optimized for the present conditions. A subsequent individual parametric analysis was conducted to determine those parameters that were informed by the optimization, defined as those imparting a  $>5\%$  increase in SSR when individually varied within their allowed bounds. All 10 parameters were identified as informed by the optimization, and the simulated  $[O_2]$  curve using the optimal parameter set was in excellent agreement with measurements under 50  $\mu\text{M}$  and 10  $\mu\text{M } O_2$  conditions (SI Appendix, Fig. S14B).

### Training cellular parameters on $[NO\bullet]$ measurements

For each optimization described below, the associated parameter bounds, optimal values, and confidence intervals can be found in Dataset S3, while the corresponding AIC and SSR of each best-fit parameter set are presented in SI Appendix, Table S2.

#### *Initial optimization*

Uncertain cellular parameters not associated with the respiratory module were released and optimized to fit  $[NO\bullet]$  curves measured at 0 and 50  $\mu\text{M } O_2$ . Using the best-fit model from the optimization, a parametric sensitivity analysis was conducted, and determined that 17 of the 50 released parameters were informed by the optimization. The MCMC method was used to further explore the viable parameter space defined by these 17 informed parameters, and yielded an additional 381 viable parameter sets with an ER  $< 10$ .

#### *Optimization of model on all $[O_2]$ conditions (“Stage 1”)*

The 17 parameters identified as important in the initial optimization were re-optimized to simultaneously fit  $[NO\bullet]$  curves measured under conditions of 0, 5, 10, 20, and 50  $\mu\text{M } O_2$ . The

optimized [NO•] curves exhibited improved agreement with measurements at 5, 10, and 20  $\mu\text{M}$   $\text{O}_2$  relative to the original optimization, but at the expense of performance at 50  $\mu\text{M}$   $\text{O}_2$ . Given the poor performance of the model at 50  $\mu\text{M}$   $\text{O}_2$ , an MCMC analysis of the parameter space was not performed.

#### *Release of all cellular parameters (“Stage 2”)*

To determine if the model could fit the measured [NO•] profiles under all [ $\text{O}_2$ ] conditions explored (0, 5, 10, 20, and 50  $\mu\text{M}$   $\text{O}_2$ ) without requiring a change to the network structure, all cellular parameters (136 kinetic rate constants and species concentrations specific to the organism) were released and optimized. Despite the increased parametric flexibility, the optimization did not yield a lower AIC, as the reduction in SSR was insufficient to offset the penalty of including additional parameters. As such, an MCMC analysis was not performed.

#### *Optimization of model with [ $\text{O}_2$ ]-dependent translation (“Stage 3”)*

After implementing an [ $\text{O}_2$ ] dependency in the rate of translation, the 17 parameters from the initial optimization, as well as the two new parameters introduced with the new translation rate equation ( $k_{\text{act},\text{O}_2}$  and  $K_{\text{d},\text{O}_2}$ ), were optimized on the [NO•] curves measured at the five different  $\text{O}_2$  concentrations. The optimization yielded a parameter set with a sufficient decrease in SSR to justify the inclusion of the two additional parameters, as quantified by a decrease in AIC. An MCMC walk from the optimal parameter set yielded an additional 2,339 viable parameter sets with an ER < 10.

#### *Inclusion of CYT-related parameters in model optimization (“Stage 4”)*

After performing the reaction deletion analysis, which predicted the involvement of CYT in [NO•] oscillations, four parameters governing the NO•-mediated inhibition of CYT ( $k_{\text{CYTbo},\text{NO}\cdot\text{-on}}$ ,  $k_{\text{CYTbd},\text{NO}\cdot\text{-on}}$ ,  $K_{\text{m},\text{CYTbo},\text{O}_2}$ , and  $K_{\text{m},\text{CYTbd},\text{O}_2}$ ) were released for optimization on [NO•] curves at all measured [ $\text{O}_2$ ] conditions, along with the 19 parameters included in the previous optimization. The best-fit model obtained from the optimization exhibited sufficient improvement in SSR to offset the penalty of releasing four additional parameters (AIC was decreased). A subsequent run of the MCMC method provided 240 additional viable parameter sets with an ER < 10.

#### *Parameter optimization on CAM-treated [NO•] data*

Treatment with CAM (a translation inhibitor) was accomplished *in silico* by simulating NO• treatment (at 10  $\mu\text{M}$   $\text{O}_2$ ) for 1.5 h, setting all translation rates to zero, and resuming the simulation. The 23 parameters released in the previous optimization were again allowed to vary in an effort to fit the experimental CAM-treated [NO•] data. Simulated [NO•] curves with the optimal parameter set were in excellent agreement with measurements, and an MCMC walk generated an additional 668 viable parameter sets with ER < 10.

## SUPPORTING FIGURES

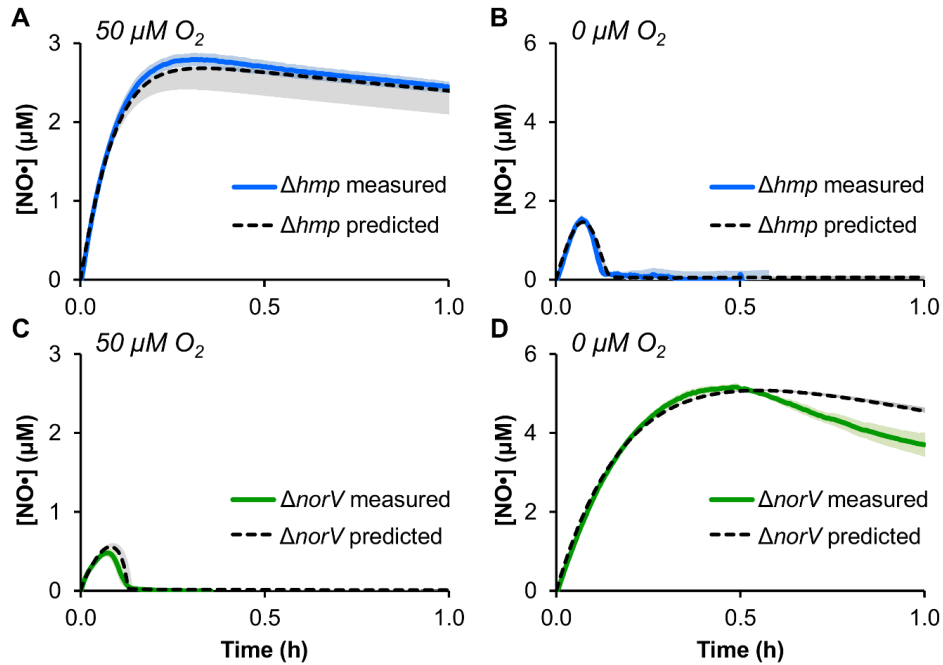

**Fig. S1.** Experimental validation of predicted  $\Delta hmp$  and  $\Delta norV$   $[\text{NO}\cdot]$  at 50 and 0  $\mu\text{M O}_2$ .  $\text{NO}\cdot$  treatment (50  $\mu\text{M}$  DPTA NONOate) was simulated using parameter values trained on WT  $[\text{NO}\cdot]$  measurements at 50 and 0  $\mu\text{M O}_2$  to predict the effect of the  $\Delta hmp$  mutation on  $\text{NO}\cdot$  clearance at (A) 50  $\mu\text{M O}_2$  and (B) 0  $\mu\text{M O}_2$ , as well as (C)  $\Delta norV$  at 50  $\mu\text{M O}_2$  and (D) 0  $\mu\text{M O}_2$ . Black dashed lines are simulations using the best-fit (minimum SSR, ER = 1) parameter set, where gray shading represents prediction uncertainty (range of viable parameter sets with ER < 10). The corresponding experimental measurements were performed, wherein exponential-phase  $\Delta hmp$  or  $\Delta norV$  *E. coli* ( $\text{OD}_{600} = 0.05$ ) were treated with 50  $\mu\text{M}$  DPTA NONOate at 50 or 0  $\mu\text{M O}_2$  (solid lines; mean of three independent experiments with shading representing the SEM). The  $\text{O}_2$  concentration corresponds to the concentration of dissolved  $\text{O}_2$  in cell-free media that was in equilibrium with the atmosphere of the hypoxic chamber.

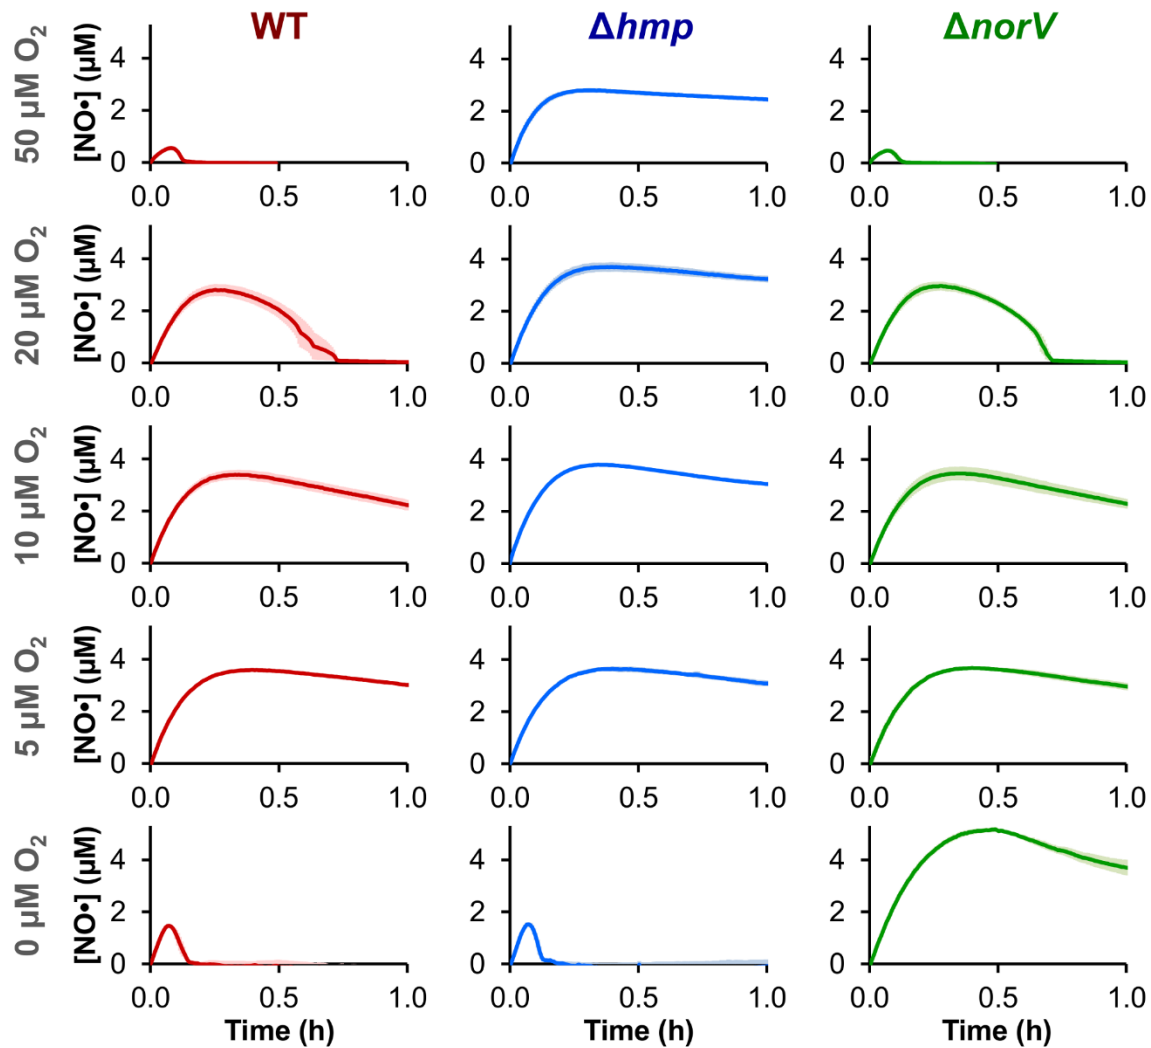

**Fig. S2.**  $NO\bullet$  detoxification in WT,  $\Delta hmp$ , and  $\Delta norV$  cultures under various  $[O_2]$ . Cultures of WT,  $\Delta hmp$ , or  $\Delta norV$  *E. coli* ( $OD_{600} = 0.05$ ) were treated with 50  $\mu M$  DPTA NONOate at 50, 20, 10, 5, and 0  $\mu M$   $[O_2]$ , and the resulting  $[NO\bullet]$  was measured, showing up to 1 h post-dose. Data are the mean of at least 3 independent experiments, where shading of a similar color represents the SEM.

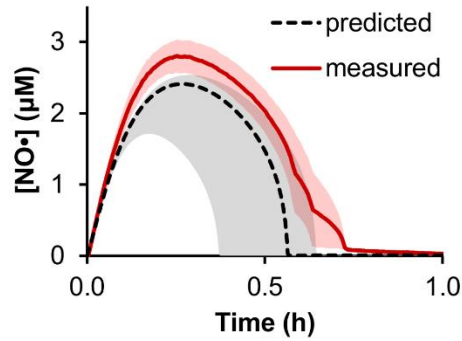

**Fig. S3.** Comparison of predicted and measured  $[\text{NO}\bullet]$  at  $20\ \mu\text{M}\ \text{O}_2$ . Shown are the predicted (dashed black lines) and measured (solid red lines)  $[\text{NO}\bullet]$  curves following treatment of WT *E. coli* ( $\text{OD}_{600} = 0.05$ ) with  $50\ \mu\text{M}$  DPTA NONOate at  $20\ \mu\text{M}\ \text{O}_2$ . The measured  $[\text{NO}\bullet]$  is the mean of 3 independent experiments, with light red shading representing the SEM. Predicted  $[\text{NO}\bullet]$  curves were obtained using the best-fit parameter set (from initial optimization on  $[\text{NO}\bullet]$  measured at 0 and  $50\ \mu\text{M}\ \text{O}_2$ ), with gray shading representing prediction uncertainty (range of viable parameter sets with  $\text{ER} < 10$ ).

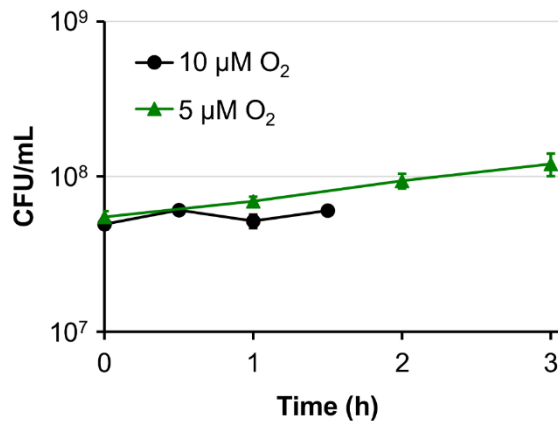

**Fig. S4.** Assessing cell culturability during  $\text{NO}\bullet$  treatment at 5 and  $10\ \mu\text{M}\ \text{O}_2$ . WT *E. coli* at an  $\text{OD}_{600}$  of 0.05 were treated with  $50\ \mu\text{M}$  DPTA NONOate at 5 or  $10\ \mu\text{M}\ \text{O}_2$ . Samples were removed immediately prior to DPTA NONOate treatment, and at 3 additional time points post-treatment, and plated on LB + agar to determine the concentration of colony forming units (CFUs). Measurements were made out to 1.5 and 3 h post-dose for 10 and  $5\ \mu\text{M}\ \text{O}_2$ , respectively, as  $\text{NO}\bullet$  was largely cleared from the culture by those times. Data are the mean of 3 independent experiments, with error bars representing the SEM.

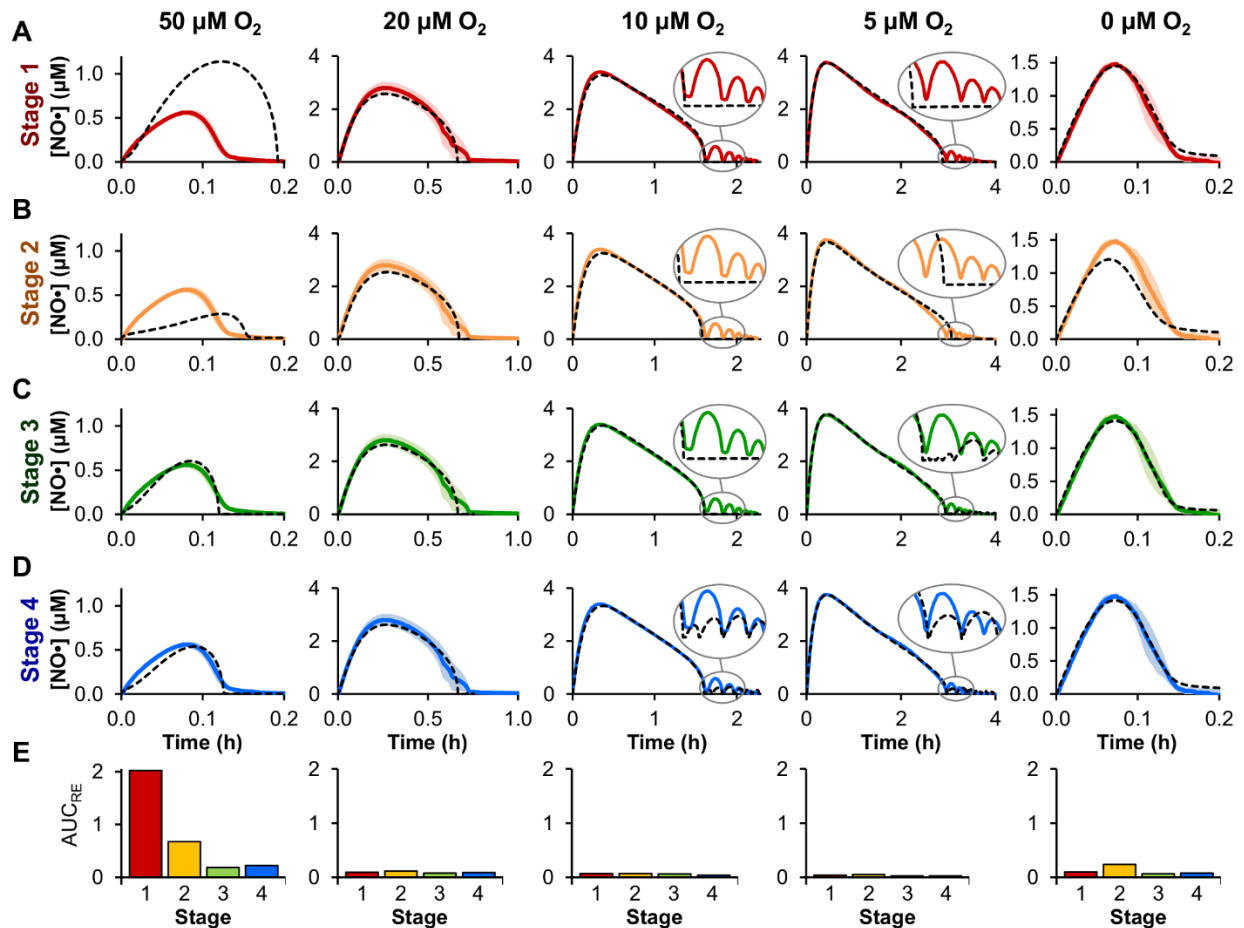

**Fig. S5.** Assessment of model performance at each stage of parameter optimization. Cultures of WT *E. coli* ( $OD_{600} = 0.05$ ) were treated with 50  $\mu\text{M}$  DPTA NONOate at 50, 20, 10, 5, and 0  $\mu\text{M}$   $\text{O}_2$  and the resulting  $[\text{NO}\cdot]$  was measured (solid lines). Measured  $[\text{NO}\cdot]$  curves without oscillations (0, 20, and 50  $\mu\text{M}$   $\text{O}_2$ ) are the mean of at least 3 independent experiments with shading representing the SEM, while those with oscillations (5 and 10  $\mu\text{M}$   $\text{O}_2$ ) are a representative measurement of at least 3 independent experiments (the results of which are shown in SI Appendix, Figs. S13 A and C). Model parameters were trained on measured  $[\text{NO}\cdot]$  from all five  $\text{O}_2$  conditions, where the simulation run using the best-fit parameter set is shown (black dashed lines). For 5 and 10  $\mu\text{M}$   $\text{O}_2$  conditions, a region of the  $[\text{NO}\cdot]$  plot is magnified to more easily view oscillations. (A) *Stage 1*: 17 parameters were optimized, using the original model structure (without  $\text{O}_2$ -dependent translation rate). (B) *Stage 2*: all 136 cellular parameters were optimized, using the original model structure. (C) *Stage 3*: 19 parameters were optimized, where the 2 additional parameters ( $k_{\text{act},\text{O}_2}$  and  $K_{\text{d},\text{O}_2}$ ) were those governing the added  $\text{O}_2$ -dependency of the translation rate. (D) *Stage 4*: 23 parameters were optimized, where the 4 additional parameters ( $k_{\text{CYTbo},\text{NO}\cdot\text{-on}}$ ,  $k_{\text{CYTbd},\text{NO}\cdot\text{-on}}$ ,  $K_{\text{m},\text{CYTbo},\text{O}_2}$ , and  $K_{\text{m},\text{CYTbd},\text{O}_2}$ ) were those governing kinetics of  $\text{NO}\cdot$ -mediated cytochrome inhibition (again using the  $\text{O}_2$ -dependent translation rate equation). (E) Comparison of  $\text{AUC}_{\text{RE}}$  (relative area-under-the-curve error) calculated for simulated vs. measured  $[\text{NO}\cdot]$  for each optimization stage (red, yellow, green, and blue bars for *Stages 1–4*, respectively).



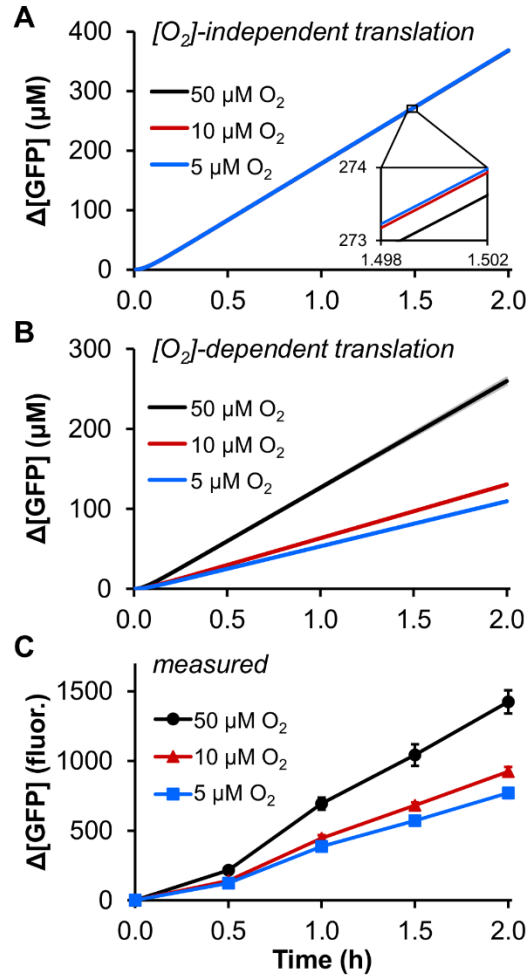

**Fig. S6.** Experimental confirmation of the predicted effect of  $[O_2]$  on translation. Production of GFP (driven by the  $P_{hmp}$  promoter in  $\Delta hmp$  *E. coli*; see *Methods*) following treatment with 50  $\mu M$  DPTA NONOate at 5, 10, and 50  $\mu M$   $O_2$  was predicted using (A) the original model structure, which excluded an  $[O_2]$ -dependent translation rate, and (B) the revised model structure, which included an  $[O_2]$ -dependent translation rate (optimization “Stage 1” and “Stage 3”, respectively). Predicted curves were generated using the best-fit parameter set, with shading representing prediction uncertainty (range of viable parameter sets with  $ER < 10$ ). The inset in (A) is provided to demonstrate that all three curves are present, but nearly aligned. (C) The corresponding experiments were performed, where  $\Delta hmp$  *E. coli* possessing  $P_{hmp}$ -GFP on a plasmid were treated with 50  $\mu M$  DPTA NONOate ( $OD_{600} = 0.05$ ), and samples were removed every 30 min to quantify GFP fluorescence (485 nm excitation, 515 nm emission). Fluorescence measured at the time of treatment ( $t = 0$ ) was subtracted from each reading to determine the change in protein abundance ( $\Delta[GFP]$ ). Fluorescence data are the mean of 3 independent experiments, with error bars representing the SEM.

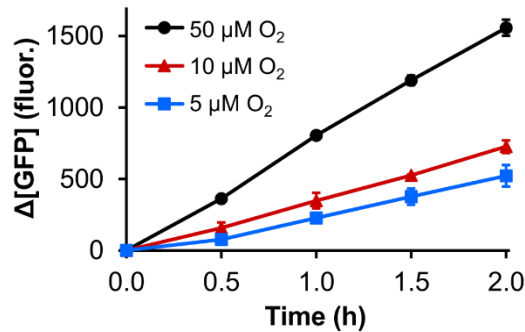

**Fig. S7.** Assessing whether the effect of  $[O_2]$  on translation is specific to  $P_{hmp}$  and  $NO\bullet$  stress conditions. WT *E. coli* possessing an IPTG-inducible  $P_{T5}$ -GFP on a plasmid were grown to exponential phase, delivered to the bioreactor to an initial  $OD_{600}$  of 0.05, and induced immediately with 1 mM IPTG (in the absence of  $NO\bullet$ ). Samples were taken every 30 min and diluted to maintain a constant  $OD_{600}$  of 0.05 prior to fluorescence quantification, as cells were growing due to the lack of  $NO\bullet$  treatment. The assay was conducted at 5, 10, and 50  $\mu M O_2$ . Data are the mean of 3 independent experiments, with error bars representing the SEM.

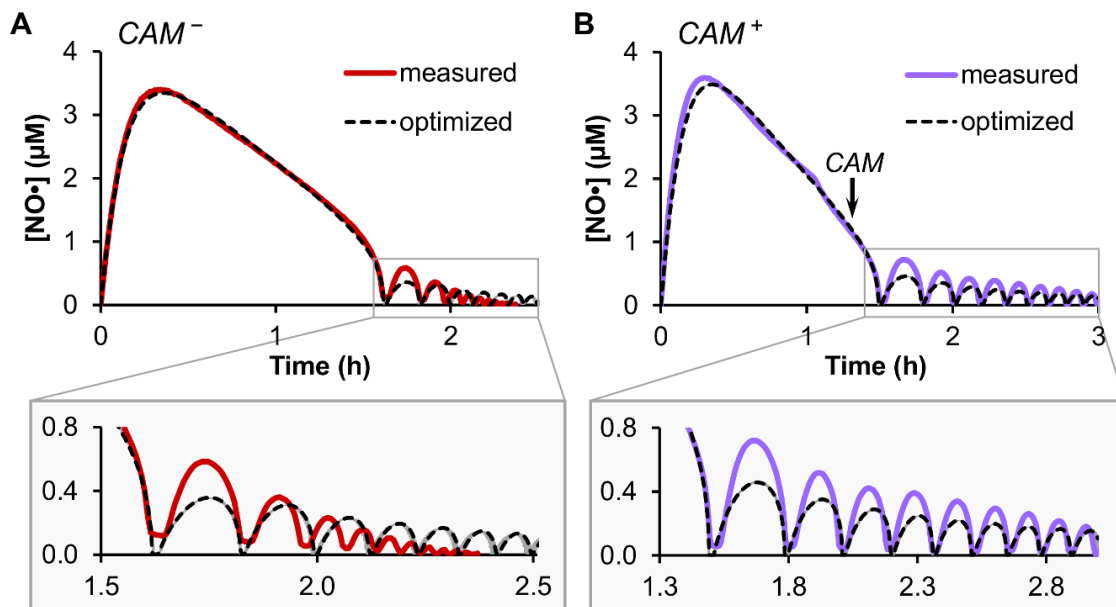

**Fig. S8.**  $[NO\bullet]$  oscillation dynamics in the presence and absence of translation.  $[NO\bullet]$  was measured in cultures of WT *E. coli* following treatment with 50  $\mu M$  DPTA NONOate at 10  $\mu M O_2$ , either (A) without or (B) with 100  $\mu g/mL$  CAM treatment at  $t = 1.25$  h (~15 min prior to initial  $NO\bullet$  clearance, indicated by arrow). Measured  $[NO\bullet]$  (solid lines) are representative of at least 3 independent experiments, the results of which are shown in SI Appendix, Figs. S13 A and G (for  $CAM^-$  and  $CAM^+$ , respectively). Simulated  $[NO\bullet]$  curves (dashed black lines) represent the best-fit parameter set obtained from an optimization on the measured WT  $[NO\bullet]$  curve at 10  $\mu M O_2$  (A) without or (B) with CAM, where CAM treatment was simulated by fixing the translation rate to zero at the time of initial  $NO\bullet$  clearance. Gray shading on the optimized  $[NO\bullet]$  curves (very small) represent the range of simulations from viable parameter sets with  $ER < 10$ .

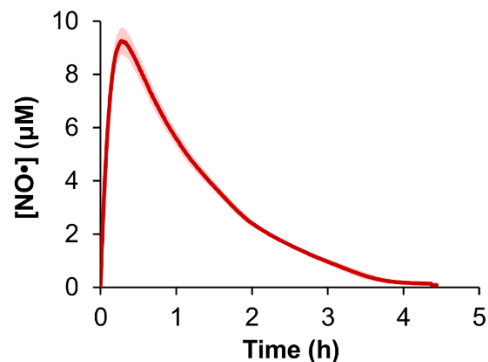

**Fig. S9.** NO• detoxification in WT *P. aeruginosa* cultures at 10 µM O<sub>2</sub>. *P. aeruginosa* in BSM + 15 mM succinate media at an OD<sub>600</sub> of 0.05 was treated with 50 µM DPTA NONOate in an environment of 10 µM O<sub>2</sub>, and the resulting concentration of NO• was measured. The data are the mean of 3 independent experiments, with light red shading representing the SEM.

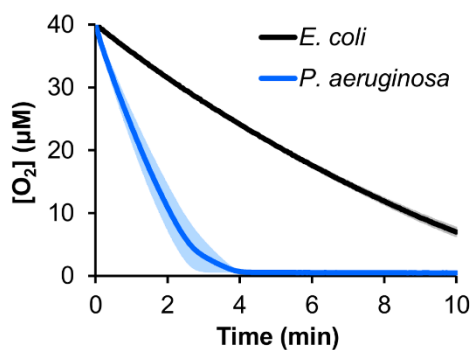

**Fig. S10.** Comparison of *E. coli* and *P. aeruginosa* O<sub>2</sub> consumption rate. WT *E. coli* or *P. aeruginosa* were grown to mid-exponential phase in an environment of 50 µM O<sub>2</sub> and diluted into the bioreactor (OD<sub>600</sub> = 0.05), and the resulting [O<sub>2</sub>] was measured. Time zero was set as the time at which [O<sub>2</sub>] = 40 µM, to facilitate direct comparison between the [O<sub>2</sub>] curves. Data are the mean of 3 independent experiments, with shading representing the SEM.

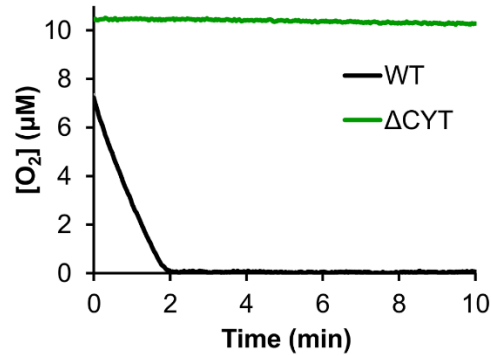

**Fig. S11.** Experimental confirmation of negligible O<sub>2</sub> consumption by ΔCYT. Cultures of WT or ΔCYT *E. coli* were grown under a 10 µM O<sub>2</sub> environment to exponential phase, diluted to an OD<sub>600</sub> of 0.05 in the bioreactor, and [O<sub>2</sub>] was monitored. The WT culture began at a moderately lower [O<sub>2</sub>] (~7 µM) due to O<sub>2</sub>-depletion in the inoculum (caused by cellular respiration in a more concentrated culture). Data are the average of 3 independent experiments, with shading (very small) representing the SEM.

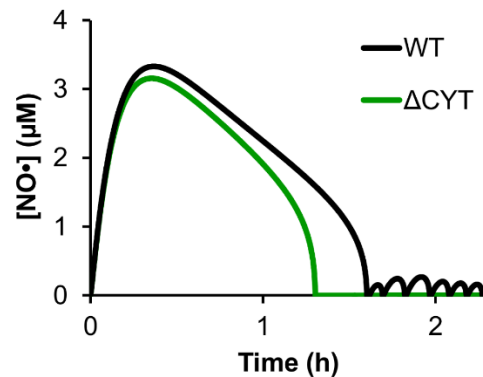

**Fig. S12.** Predicted elimination of oscillations upon CYT deletion. Simulated [NO•] resulting from the treatment of WT or ΔCYT cultures with 50 µM DPTA NONOate, using parameters values obtained from optimization “Stage 4.” Solid lines are the best-fit parameter set, with shading (very small) representing prediction uncertainty. Predictions assumed the typical pH of 7.4 exhibited by WT cultures grown in the presence of O<sub>2</sub>.

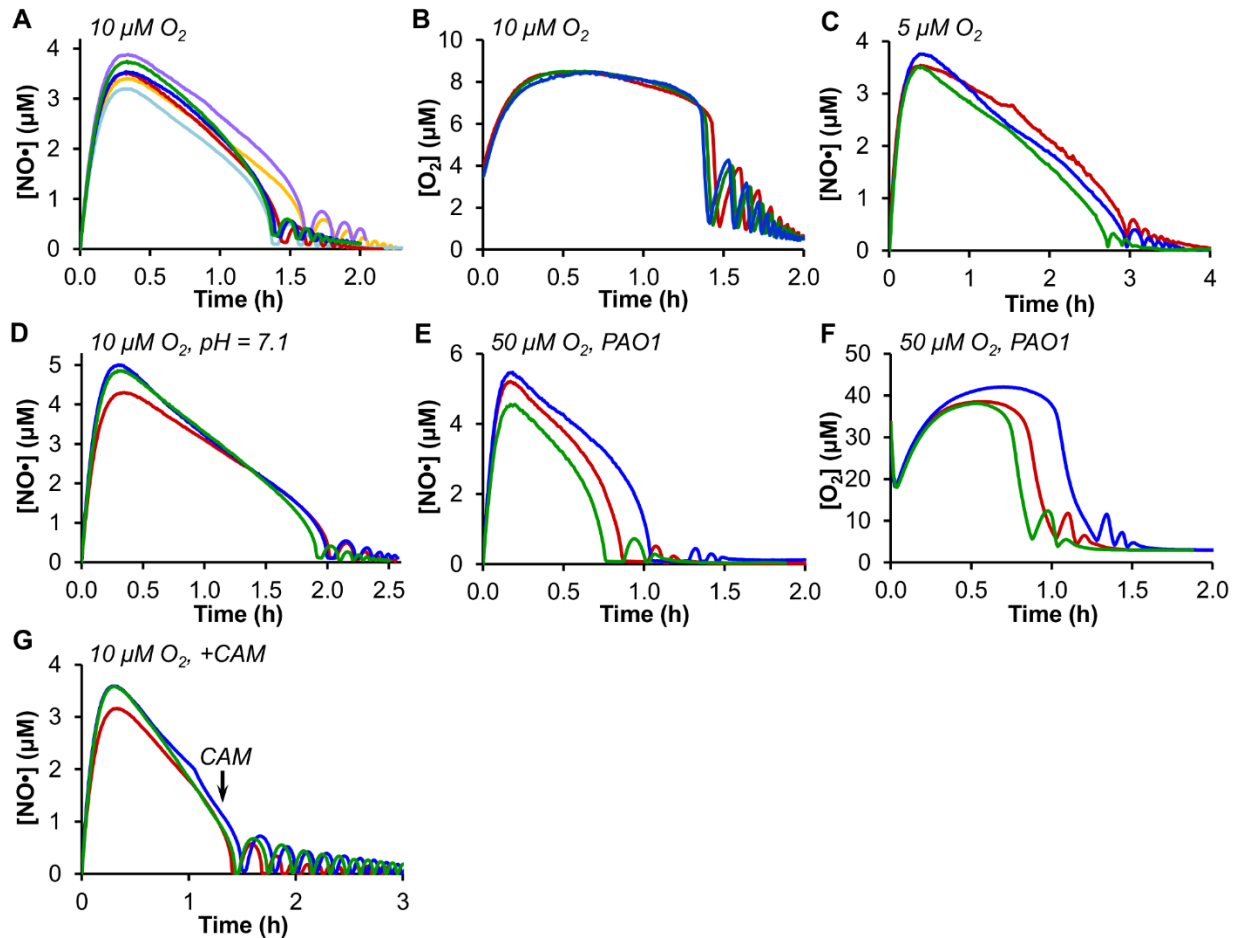

**Fig. S13.** Experimental replicates for  $[\text{NO}\bullet]$  and  $[\text{O}_2]$  curves exhibiting oscillations. Given that small shifts in  $\text{NO}\bullet$  clearance time or oscillation phase yield average  $[\text{NO}\bullet]$  or  $[\text{O}_2]$  curves that obscured the dynamics of the oscillations, figures in the present study typically show a representative experiment (rather than the average of all replicates) for concentration curves exhibiting oscillations. For completeness, all experimental replicates are presented here for any condition for which a representative curve was presented in another figure. (A)  $[\text{NO}\bullet]$  and (B)  $[\text{O}_2]$  was measured in cultures of WT *E. coli* ( $\text{OD}_{600} = 0.05$ ) treated with 50  $\mu\text{M}$  DPTA NONOate at 10  $\mu\text{M}$   $\text{O}_2$ , or (C)  $[\text{NO}\bullet]$  was measured at 5  $\mu\text{M}$   $\text{O}_2$ . (D) Identical conditions as (A), except the pH was adjusted to 7.1 (from 7.4) immediately prior to DPTA NONOate treatment. (E)  $[\text{NO}\bullet]$  and (F)  $[\text{O}_2]$  were measured in cultures of *P. aeruginosa* treated with 50  $\mu\text{M}$  DPTA NONOate at 50  $\mu\text{M}$   $\text{O}_2$  and 0.05  $\text{OD}_{600}$  in BSM + succinate media. (G) Identical to (A), except cultures were treated with 100  $\mu\text{g}/\text{mL}$  CAM ~15 min prior to the initial  $\text{NO}\bullet$  clearance time (1.25 h after DPTA NONOate treatment). Each colored curve represents an independent experimental replicate.

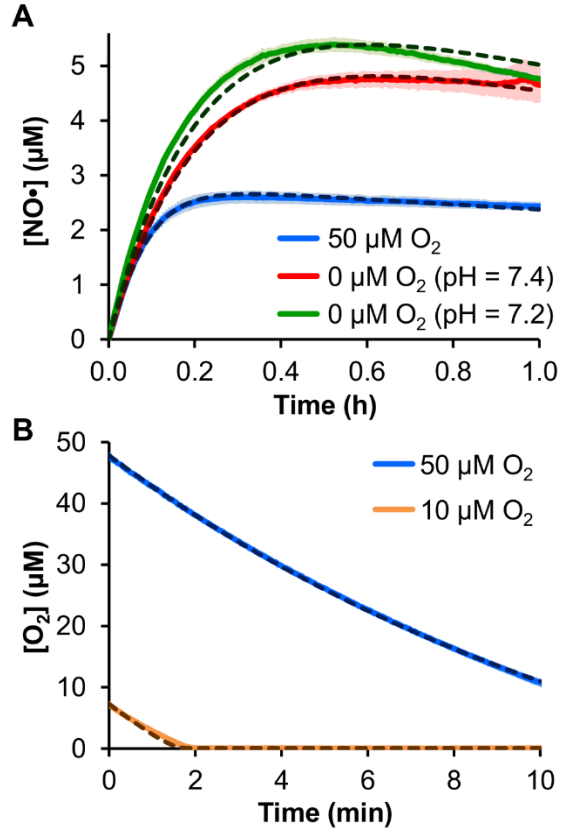

**Fig. S14.** Training of extracellular parameters and the respiratory module. (A) Cell-free media (MOPS minimal media with 10 mM glucose) was treated with 50  $\mu\text{M}$  DPTA NONOate at 0 and 50  $\mu\text{M}$   $\text{O}_2$ , and the resulting  $[\text{NO}\cdot]$  was measured (solid red and blue lines, respectively). Extracellular model parameters ( $k_{\text{NO}\cdot\text{-O}_2}$ ,  $k_{\text{LA}\text{NO}\cdot}$ , and  $k_{\text{NONOate,DPTA}}$ ) were optimized on the two measured curves, yielding the simulated  $[\text{NO}\cdot]$  shown (dashed dark red and dashed dark blue lines for 0 and 50  $\mu\text{M}$   $\text{O}_2$ , respectively). Since a pH decrease was observed in anaerobic WT *E. coli* cultures (decreased pH from 7.4 to 7.2 upon bioreactor inoculation to  $\text{OD}_{600} = 0.05$  prior to  $\text{NO}\cdot$  treatment), which increases the rate of DPTA NONOate dissociation ( $k_{\text{NONOate,DPTA}}$ ), the  $[\text{NO}\cdot]$  measurement at 0  $\mu\text{M}$   $\text{O}_2$  was repeated in cell-free media that had been adjusted to a pH of 7.2 with HCl (solid green line). The  $k_{\text{NONOate,DPTA}}$  parameter was released and trained on the pH-adjusted anaerobic  $[\text{NO}\cdot]$  data (maintaining the same  $k_{\text{NO}\cdot\text{-O}_2}$  and  $k_{\text{LA}\text{NO}\cdot}$  values obtained from the original optimization), yielding the simulated  $[\text{NO}\cdot]$  curve shown (dashed dark green line). Experimental data are the mean of 3 independent experiments, with shading representing the SEM. (B) WT *E. coli* was grown to exponential phase in an environment of 50  $\mu\text{M}$   $\text{O}_2$  and diluted into the bioreactor ( $\text{OD}_{600} = 0.05$ ) at time  $t = 0$ , and the resulting  $[\text{O}_2]$  was measured (solid blue line). Model parameters associated with aerobic respiration were trained on the measured  $[\text{O}_2]$  curve (see *Methods* and SI Appendix, Table S6), and the resulting simulated  $[\text{O}_2]$  is shown (dashed dark blue line). The optimized parameter set was used to predict the  $[\text{O}_2]$  curve for a 10  $\mu\text{M}$   $\text{O}_2$  environment (dashed brown line), and was in excellent agreement with the corresponding experimental measurement (solid orange line). Experimental data are the mean of 3 independent experiments, with shading representing the SEM.

## SUPPORTING TABLES

**Table S1. Model reactions governed by non-elementary type rate expressions.** Reaction names, rate expressions, and rate constants are shown. The numbering of reactions is continued from Dataset S2. An asterisk “\*” indicates kinetic parameters whose values were trained on experimental measurements in the present study. All reactions presented here occur within the intracellular compartment, unless otherwise noted.

| #   | Reaction name, equation, and kinetic expression                                                                                                                                                                                                         | Parameters                                                                                                                                                | Refs. <sup>a</sup>  |
|-----|---------------------------------------------------------------------------------------------------------------------------------------------------------------------------------------------------------------------------------------------------------|-----------------------------------------------------------------------------------------------------------------------------------------------------------|---------------------|
| 161 | “ISCUloadS1”<br>$\text{IscU} + 2 \text{Cys} \xrightarrow{\text{IscS}} \text{IscU}(\text{2S})^{2-} + 2 \text{Ala} + 2 \text{H}^+$                                                                                                                        | $k_{\text{cat}} = 0.07 \text{ s}^{-1}$<br>$K_{\text{Cys}} = (1-100) \times 10^{-6} \text{ M} *$<br>$K_{\text{IscU}} = (1-100) \times 10^{-6} \text{ M} *$ | (5)<br>(5)<br>(5,6) |
|     | $r = \frac{k_{\text{cat}} [\text{IscS}][\text{IscU}][\text{Cys}]}{[\text{IscU}][\text{Cys}] + K_{\text{Cys}}[\text{IscU}] + K_{\text{IscU}}[\text{Cys}]}$                                                                                               |                                                                                                                                                           |                     |
| 162 | “ISCUloadS2”<br>$\text{IscU}([\text{2Fe-2S}]^{2-}) + 2 \text{Cys} \xrightarrow{\text{IscS}} \text{IscU}([\text{2Fe-2S}]-\text{2S})^{4-} + 2 \text{Ala} + 2 \text{H}^+$                                                                                  | $k_{\text{cat}} = 0.07 \text{ s}^{-1}$<br>$K_{\text{Cys}} = (1-100) \times 10^{-6} \text{ M} *$<br>$K_{\text{IscU}} = (1-100) \times 10^{-6} \text{ M} *$ | (5)<br>(5)<br>(5,6) |
|     | $r = \frac{k_{\text{cat}} [\text{IscS}][\text{IscU}(\text{2Fe2S})][\text{Cys}]}{[\text{IscU}(\text{2Fe2S})][\text{Cys}] + K_{\text{Cys}}[\text{IscU}(\text{2Fe2S})] + K_{\text{IscU}(\text{2Fe2S})}[\text{Cys}]}$                                       |                                                                                                                                                           |                     |
| 163 | “isc2Fe2Srep1”<br>$P_{\text{2Fe2S}}(\text{apo}) + \text{IscU}([\text{2Fe-2S}]^{2-}) + \text{ATP} + \text{H}_2\text{O} \xrightarrow{\text{HscAB}} \text{IscU} + P_{\text{2Fe2S}}(\text{holo}) + \text{ADP} + \text{P}_i + \text{H}^+$                    | $k_{\text{cat}} = (1-1000) \times 10^{-4} \text{ s}^{-1} *$<br>$K_{P_{\text{2Fe2S}}(\text{apo})} = (1-100) \times 10^{-6} \text{ M} *$                    | (7)<br>(7)          |
|     | $r = \frac{k_{\text{cat}} [\text{IscU}(\text{2Fe2S})][P_{\text{2Fe2S}}(\text{apo})]}{K_{P_{\text{2Fe2S}}(\text{apo})} + [P_{\text{2Fe2S}}(\text{apo})]}$                                                                                                |                                                                                                                                                           |                     |
| 164 | “isc2Fe2Srep2”<br>$P_{\text{2Fe2S}}(\text{apo}) + \text{IscU}([\text{2Fe-2S}]_2)^{4-} + \text{ATP} + \text{H}_2\text{O} \xrightarrow{\text{HscAB}} \text{IscU}([\text{2Fe-2S}]) + P_{\text{2Fe2S}}(\text{holo}) + \text{ADP} + \text{P}_i + \text{H}^+$ | $k_{\text{cat}} = (1-1000) \times 10^{-4} \text{ s}^{-1} *$<br>$K_{P_{\text{2Fe2S}}(\text{apo})} = (1-100) \times 10^{-6} \text{ M} *$                    | (7)<br>(7)          |
|     | $r = \frac{k_{\text{cat}} [\text{IscU}(\text{2Fe2S})_2][P_{\text{2Fe2S}}(\text{apo})]}{K_{P_{\text{2Fe2S}}(\text{apo})} + [P_{\text{2Fe2S}}(\text{apo})]}$                                                                                              |                                                                                                                                                           |                     |
| 165 | “dXTSNbe”<br>$\text{DNA}(\text{dX}) + \text{H}_2\text{O} \xrightarrow{\text{AlkA}} \text{DNA}(\text{AP}_G) + \text{X}$                                                                                                                                  | $k_{\text{cat}} = 4.0 \times 10^{-4} \text{ s}^{-1}$<br>$K_{\text{DNA}(\text{dX})} = (1-100) \times 10^{-8} \text{ M} *$                                  | (8)<br>(8)          |
|     | $r = \frac{k_{\text{cat}} [\text{AlkA}][\text{DNA}(\text{dX})]}{K_{\text{DNA}(\text{dX})} + [\text{DNA}(\text{dX})]}$                                                                                                                                   |                                                                                                                                                           |                     |
| 166 | “dINbe”<br>$\text{DNA}(\text{dI}) + \text{H}_2\text{O} \xrightarrow{\text{AlkA}} \text{DNA}(\text{AP}_A) + \text{hX}$                                                                                                                                   | $k_{\text{cat}} = 1.3 \times 10^{-3} \text{ s}^{-1}$<br>$K_{\text{DNA}(\text{dI})} = (1-100) \times 10^{-8} \text{ M} *$                                  | (9)<br>(9)          |
|     | $r = \frac{k_{\text{cat}} [\text{AlkA}][\text{DNA}(\text{dI})]}{K_{\text{DNA}(\text{dI})} + [\text{DNA}(\text{dI})]}$                                                                                                                                   |                                                                                                                                                           |                     |

|     |           |                                                                                                                                                                                                                                                                                                                                                                                                                                                                                    |                                                                                                                                                                                                                                                                                                           |                                      |
|-----|-----------|------------------------------------------------------------------------------------------------------------------------------------------------------------------------------------------------------------------------------------------------------------------------------------------------------------------------------------------------------------------------------------------------------------------------------------------------------------------------------------|-----------------------------------------------------------------------------------------------------------------------------------------------------------------------------------------------------------------------------------------------------------------------------------------------------------|--------------------------------------|
| 167 | “dURibe”  | $\text{DNA(dU)} + \text{H}_2\text{O} \xrightarrow{\text{Ung}} \text{DNA(AP}_C) + \text{U}$                                                                                                                                                                                                                                                                                                                                                                                         | $k_{\text{cat}} = 0.5 \text{ s}^{-1}$<br>$K_{\text{DNA(dU)}} = (1-100) \times 10^{-8} \text{ M} *$                                                                                                                                                                                                        | (10)<br>(10,11)                      |
|     |           | $r = \frac{k_{\text{cat}} [\text{Ung}][\text{DNA(dU)}]}{K_{\text{DNA(dU)}} + [\text{DNA(dU)}]}$                                                                                                                                                                                                                                                                                                                                                                                    |                                                                                                                                                                                                                                                                                                           |                                      |
| 168 | “APgrem”  | $\text{DNA(AP}_G) + 2 \text{ H}_2\text{O} \xrightarrow{\text{Xth}} \text{DNA(dG)}_{\text{gap}} + 2 \text{ H}^+ + \text{dR5P}$                                                                                                                                                                                                                                                                                                                                                      | $k_{\text{cat}} = 0.23 \text{ s}^{-1}$<br>$K_{\text{DNA(APG)}} = 1.6 \times 10^{-8} \text{ M}$                                                                                                                                                                                                            | (12)<br>(12)                         |
|     |           | $r = \frac{k_{\text{cat}} [\text{Xth}][\text{DNA(AP}_G)]}{K_{\text{DNA(APG)}} + [\text{DNA(AP}_G)]}$                                                                                                                                                                                                                                                                                                                                                                               |                                                                                                                                                                                                                                                                                                           |                                      |
| 169 | “AParem”  | $\text{DNA(AP}_A) + 2 \text{ H}_2\text{O} \xrightarrow{\text{Xth}} \text{DNA(dA)}_{\text{gap}} + 2 \text{ H}^+ + \text{dR5P}$                                                                                                                                                                                                                                                                                                                                                      | $k_{\text{cat}} = 0.23 \text{ s}^{-1}$<br>$K_{\text{DNA(APA)}} = 1.6 \times 10^{-8} \text{ M}$                                                                                                                                                                                                            | (12)<br>(12)                         |
|     |           | $r = \frac{k_{\text{cat}} [\text{Xth}][\text{DNA(AP}_A)]}{K_{\text{DNA(APA)}} + [\text{DNA(AP}_A)]}$                                                                                                                                                                                                                                                                                                                                                                               |                                                                                                                                                                                                                                                                                                           |                                      |
| 170 | “APcrem”  | $\text{DNA(AP}_C) + 2 \text{ H}_2\text{O} \xrightarrow{\text{Xth}} \text{DNA(dC)}_{\text{gap}} + 2 \text{ H}^+ + \text{dR5P}$                                                                                                                                                                                                                                                                                                                                                      | $k_{\text{cat}} = 0.23 \text{ s}^{-1}$<br>$K_{\text{DNA(APC)}} = 1.6 \times 10^{-8} \text{ M}$                                                                                                                                                                                                            | (12)<br>(12)                         |
|     |           | $r = \frac{k_{\text{cat}} [\text{Xth}][\text{DNA(AP}_C)]}{K_{\text{DNA(APC)}} + [\text{DNA(AP}_C)]}$                                                                                                                                                                                                                                                                                                                                                                               |                                                                                                                                                                                                                                                                                                           |                                      |
| 171 | “dGSNpol” | $\text{DNA(dG)}_{\text{gap}} + \text{dGTP} \xrightarrow{\text{PolI}} \text{DNA(dG)}_{\text{nick}} + \text{PP}_i$                                                                                                                                                                                                                                                                                                                                                                   | $k_{\text{cat}} = 14 \text{ s}^{-1}$<br>$K_{\text{DNA(dG)}_{\text{gap}}} = 5.4 \times 10^{-9} \text{ M}$<br>$K_{i,\text{DNA(dG)}_{\text{gap}}} = 8.1 \times 10^{-9} \text{ M}$<br>$K_{i,\text{DNA(dG)}_{\text{nick}}} = 2.2 \times 10^{-8} \text{ M}$<br>$K_{\text{dGTP}} = 1.3 \times 10^{-6} \text{ M}$ | (13)<br>(13)<br>(13)<br>(13)<br>(14) |
|     |           | $r = \frac{k_{\text{cat}} [\text{PolI}][\text{dGTP}][\text{DNA(dG)}_{\text{gap}}]}{K_{i,\text{DNA(dG)}_{\text{gap}}} K_{\text{dGTP}} + K_{\text{DNA(dG)}_{\text{gap}}} [\text{dGTP}] + K_{\text{dGTP}} [\text{DNA(dG)}_{\text{gap}}] \left( 1 + \frac{K_{i,\text{DNA(dG)}_{\text{gap}}}}{K_{i,\text{DNA(dG)}_{\text{nick}}}} \right) + [\text{DNA(dG)}_{\text{gap}}] [\text{dGTP}] \left( 1 + \frac{K_{\text{DNA(dG)}_{\text{gap}}}}{K_{i,\text{DNA(dG)}_{\text{nick}}}} \right)}$ |                                                                                                                                                                                                                                                                                                           |                                      |
| 172 | “dDADpol” | $\text{DNA(dA)}_{\text{gap}} + \text{dATP} \xrightarrow{\text{PolI}} \text{DNA(dA)}_{\text{nick}} + \text{PP}_i$                                                                                                                                                                                                                                                                                                                                                                   | $k_{\text{cat}} = 14 \text{ s}^{-1}$<br>$K_{\text{DNA(dA)}_{\text{gap}}} = 5.4 \times 10^{-9} \text{ M}$<br>$K_{i,\text{DNA(dA)}_{\text{gap}}} = 8.1 \times 10^{-9} \text{ M}$<br>$K_{i,\text{DNA(dA)}_{\text{nick}}} = 2.2 \times 10^{-8} \text{ M}$<br>$K_{\text{dATP}} = 3.7 \times 10^{-6} \text{ M}$ | (13)<br>(13)<br>(13)<br>(13)<br>(14) |
|     |           | $r = \frac{k_{\text{cat}} [\text{PolI}][\text{dATP}][\text{DNA(dA)}_{\text{gap}}]}{K_{i,\text{DNA(dA)}_{\text{gap}}} K_{\text{dATP}} + K_{\text{DNA(dA)}_{\text{gap}}} [\text{dATP}] + K_{\text{dATP}} [\text{DNA(dA)}_{\text{gap}}] \left( 1 + \frac{K_{i,\text{DNA(dA)}_{\text{gap}}}}{K_{i,\text{DNA(dA)}_{\text{nick}}}} \right) + [\text{DNA(dA)}_{\text{gap}}] [\text{dATP}] \left( 1 + \frac{K_{\text{DNA(dA)}_{\text{gap}}}}{K_{i,\text{DNA(dA)}_{\text{nick}}}} \right)}$ |                                                                                                                                                                                                                                                                                                           |                                      |



|     |           |                                                                                                                                                                                                                                                                                                                                                                                                                                                                                   |                                                                                                                                                                                                                                                                   |                                      |
|-----|-----------|-----------------------------------------------------------------------------------------------------------------------------------------------------------------------------------------------------------------------------------------------------------------------------------------------------------------------------------------------------------------------------------------------------------------------------------------------------------------------------------|-------------------------------------------------------------------------------------------------------------------------------------------------------------------------------------------------------------------------------------------------------------------|--------------------------------------|
| 173 | “dCYTpol” | $\text{DNA(dC)}_{\text{gap}} + \text{dCTP} \xrightarrow{\text{PolI}} \text{DNA(dC)}_{\text{nick}} + \text{PP}_i$                                                                                                                                                                                                                                                                                                                                                                  | $k_{\text{cat}} = 14 \text{ s}^{-1}$                                                                                                                                                                                                                              | (13)                                 |
|     |           | $r = \frac{k_{\text{cat}} [\text{PolI}][\text{dCTP}][\text{DNA(dC)}_{\text{gap}}]}{K_{i,\text{DNA(dC)}_{\text{gap}}} K_{\text{dCTP}} + K_{\text{DNA(dC)}_{\text{gap}}} [\text{dCTP}] + K_{\text{dCTP}} [\text{DNA(dC)}_{\text{gap}}] \left( 1 + \frac{K_{i,\text{DNA(dC)}_{\text{gap}}}}{K_{i,\text{DNA(dC)}_{\text{nick}}}} \right) + [\text{DNA(dC)}_{\text{gap}}][\text{dCTP}] \left( 1 + \frac{K_{\text{DNA(dC)}_{\text{gap}}}}{K_{i,\text{DNA(dC)}_{\text{nick}}}} \right)}$ | $K_{\text{DNA(dC)}_{\text{gap}}} = 5.4 \times 10^{-9} \text{ M}$<br>$K_{i,\text{DNA(dC)}_{\text{gap}}} = 8.1 \times 10^{-9} \text{ M}$<br>$K_{i,\text{DNA(dC)}_{\text{nick}}} = 2.2 \times 10^{-8} \text{ M}$<br>$K_{\text{dCTP}} = 2.1 \times 10^{-6} \text{ M}$ | (13)<br>(13)<br>(13)<br>(14)         |
| 174 | “dGSNlig” | $\text{DNA(dG)}_{\text{nick}} + \text{NAD}^+ \xrightarrow{\text{LigA}} \text{DNA(dG)} + \text{AMP} + \text{NMN} + \text{H}^+$                                                                                                                                                                                                                                                                                                                                                     | $k_{\text{cat}} = 0.023 \text{ s}^{-1}$                                                                                                                                                                                                                           | (15)                                 |
|     |           | $r = \frac{k_{\text{cat}} [\text{LigA}][\text{DNA(dG)}_{\text{nick}}][\text{NAD}^+]}{[\text{DNA(dG)}_{\text{nick}}][\text{NAD}^+] + K_{\text{NAD}^+} [\text{DNA(dG)}_{\text{nick}}] + K_{\text{DNA(dG)}_{\text{nick}}} [\text{NAD}^+]}$                                                                                                                                                                                                                                           | $K_{\text{NAD}^+} = 7.0 \times 10^{-6} \text{ M}$<br>$K_{\text{DNA(dG)}_{\text{nick}}} = 5.0 \times 10^{-8} \text{ M}$                                                                                                                                            | (15)<br>(15)                         |
| 175 | “dDADlig” | $\text{DNA(dA)}_{\text{nick}} + \text{NAD}^+ \xrightarrow{\text{LigA}} \text{DNA(dA)} + \text{AMP} + \text{NMN} + \text{H}^+$                                                                                                                                                                                                                                                                                                                                                     | $k_{\text{cat}} = 0.023 \text{ s}^{-1}$                                                                                                                                                                                                                           | (15)                                 |
|     |           | $r = \frac{k_{\text{cat}} [\text{LigA}][\text{DNA(dA)}_{\text{nick}}][\text{NAD}^+]}{[\text{DNA(dA)}_{\text{nick}}][\text{NAD}^+] + K_{\text{NAD}^+} [\text{DNA(dA)}_{\text{nick}}] + K_{\text{DNA(dA)}_{\text{nick}}} [\text{NAD}^+]}$                                                                                                                                                                                                                                           | $K_{\text{NAD}^+} = 7.0 \times 10^{-6} \text{ M}$<br>$K_{\text{DNA(dA)}_{\text{nick}}} = 5.0 \times 10^{-8} \text{ M}$                                                                                                                                            | (15)<br>(15)                         |
| 176 | “dCYTlig” | $\text{DNA(dC)}_{\text{nick}} + \text{NAD}^+ \xrightarrow{\text{LigA}} \text{DNA(dC)} + \text{AMP} + \text{NMN} + \text{H}^+$                                                                                                                                                                                                                                                                                                                                                     | $k_{\text{cat}} = 0.023 \text{ s}^{-1}$                                                                                                                                                                                                                           | (15)                                 |
|     |           | $r = \frac{k_{\text{cat}} [\text{LigA}][\text{DNA(dC)}_{\text{nick}}][\text{NAD}^+]}{[\text{DNA(dC)}_{\text{nick}}][\text{NAD}^+] + K_{\text{NAD}^+} [\text{DNA(dC)}_{\text{nick}}] + K_{\text{DNA(dC)}_{\text{nick}}} [\text{NAD}^+]}$                                                                                                                                                                                                                                           | $K_{\text{NAD}^+} = 7.0 \times 10^{-6} \text{ M}$<br>$K_{\text{DNA(dC)}_{\text{nick}}} = 5.0 \times 10^{-8} \text{ M}$                                                                                                                                            | (15)<br>(15)                         |
| 177 | “GSFDH”   | $\text{GSNO} + 2 \text{ NADH} + 2 \text{ H}^+ + \text{GSH} \xrightarrow{\text{GSFDH}} \text{GSSG} + \text{NH}_3 + \text{H}_2\text{O} + 2 \text{ NAD}^+$                                                                                                                                                                                                                                                                                                                           | $k_{\text{cat}} = 3.1 \times 10^{-3} \text{ s}^{-1}$                                                                                                                                                                                                              | (16)                                 |
|     |           | $r = \frac{k_{\text{cat}} [\text{GSFDH}][\text{GSNO}]}{K_{\text{GSNO}} + [\text{GSNO}]}$                                                                                                                                                                                                                                                                                                                                                                                          | $K_{\text{GSNO}} = 7.4 \times 10^{-4} \text{ M}$                                                                                                                                                                                                                  | (16)                                 |
| 178 | “GOR”     | $\text{GSSG} + \text{H}^+ + \text{NADPH} \xrightarrow{\text{Gor}} 2 \text{ GSH} + \text{NADP}^+$                                                                                                                                                                                                                                                                                                                                                                                  | $k_1 = 267 \text{ s}^{-1}$                                                                                                                                                                                                                                        | (17)                                 |
|     |           | $r = \frac{k_1 [\text{Gor}][\text{GSSG}][\text{NADPH}] + k_2 [\text{Gor}][\text{GSSG}]^2 [\text{NADPH}]}{K_{\text{NADPH}} [\text{GSSG}] + K_{\text{GSSG}} [\text{NADPH}] + [\text{GSSG}][\text{NADPH}] + K_1 [\text{GSSG}]^2 + K_2 [\text{GSSG}]^2 [\text{NADPH}]}$                                                                                                                                                                                                               | $k_2 = 6.55 \times 10^5 \text{ M}^{-1} \text{ s}^{-1}$<br>$K_{\text{NADPH}} = 2.2 \times 10^{-5} \text{ M}$<br>$K_{\text{GSSG}} = 9.7 \times 10^{-5} \text{ M}$<br>$K_1 = 0.022$<br>$K_2 = 3.9 \times 10^3 \text{ M}^{-1}$                                        | (18)<br>(17)<br>(17)<br>(18)<br>(18) |

|     |              |                                                                                                                                                                                                                                                                             |                                                                                                                                                                                     |                        |
|-----|--------------|-----------------------------------------------------------------------------------------------------------------------------------------------------------------------------------------------------------------------------------------------------------------------------|-------------------------------------------------------------------------------------------------------------------------------------------------------------------------------------|------------------------|
| 179 | “TRXR”       | $\text{Trx}_{\text{ox}} + \text{NADPH} + \text{H}^+ \xrightarrow{\text{TrxR}} \text{Trx}_{\text{red}} + \text{NADP}^+$                                                                                                                                                      | $k_{\text{cat}} = 41.25 \text{ s}^{-1}$                                                                                                                                             | (19)                   |
|     |              | $r = \frac{k_{\text{cat}} [\text{TrxR}] [\text{Trx}_{\text{ox}}] [\text{NADPH}]}{[\text{Trx}_{\text{ox}}] [\text{NADPH}] + K_{\text{NADPH}} [\text{Trx}_{\text{ox}}] + K_{\text{Trx}_{\text{ox}}} [\text{NADPH}]}$                                                          | $K_{\text{NADPH}} = 4.6 \times 10^{-6} \text{ M}$<br>$K_{\text{Trx}_{\text{ox}}} = 1.7 \times 10^{-6} \text{ M}$                                                                    | (19)<br>(19)           |
| 180 | “TRX_GSNO”   | $\text{Trx}_{\text{red}} + \text{GSNO} \rightarrow \text{Trx}_{\text{ox}} + \text{HNO} + \text{GSH}$                                                                                                                                                                        | $k_{\text{cat}} = 0.02 \text{ s}^{-1}$                                                                                                                                              | (20)                   |
|     |              | $r = \frac{k_{\text{cat}} [\text{Trx}_{\text{red}}] [\text{GSNO}]}{K_{\text{GSNO}} + [\text{GSNO}]}$                                                                                                                                                                        | $K_{\text{GSNO}} = 1.0 \times 10^{-5} \text{ M}$                                                                                                                                    | (20)                   |
| 181 | “EX_O2air”   | $\text{O}_{2,\text{air}} \rightleftharpoons \text{O}_{2,\text{culture}}$                                                                                                                                                                                                    | $k_{\text{L}a\text{O}_2} = 1.25 \times 10^{-3} \text{ s}^{-1}$                                                                                                                      | <i>b</i>               |
|     |              | $r = k_{\text{L}a\text{O}_2} ([\text{O}_2]_{\text{sat}} - [\text{O}_2])$                                                                                                                                                                                                    |                                                                                                                                                                                     |                        |
| 182 | “CYTbo_resp” | $\text{O}_2 + 2 \text{Q}_8\text{H}_2 \xrightarrow{\text{Cyo}} 2 \text{H}_2\text{O} + 2 \text{Q}_8$                                                                                                                                                                          | $k_{\text{cat}} = 18.3\text{--}150 \text{ s}^{-1} *$                                                                                                                                | (21-23)                |
|     |              | $r = \frac{k_{\text{cat}} [\text{Cyo}] [\text{O}_2] [\text{Q}_8\text{H}_2]^2}{K_{\text{iq1}} K_{\text{mq2}} [\text{O}_2] + K_{\text{Q}_8\text{H}_2} [\text{Q}_8\text{H}_2] [\text{O}_2] + K_{\text{O}_2} [\text{Q}_8\text{H}_2]^2 + [\text{Q}_8\text{H}_2]^2 [\text{O}_2]}$ | $K_{\text{iq1}} K_{\text{mq2}} = 2.13 \times 10^{-10} \text{ M}^2$<br>$K_{\text{Q}_8\text{H}_2} = 5.3 \times 10^{-5} \text{ M}$<br>$K_{\text{O}_2} = 6.05 \times 10^{-6} \text{ M}$ | (4,24)<br>(25)<br>(22) |
| 183 | “CYTbd_resp” | $\text{O}_2 + 2 \text{Q}_8\text{H}_2 \xrightarrow{\text{Cyd}} 2 \text{H}_2\text{O} + 2 \text{Q}_8$                                                                                                                                                                          | $k_{\text{cat}} = 12\text{--}469 \text{ s}^{-1} *$                                                                                                                                  | (21,22,24)             |
|     |              | $r = \frac{k_{\text{cat}} [\text{Cyd}] [\text{O}_2] [\text{Q}_8\text{H}_2]^2}{K_{\text{iq1}} K_{\text{mq2}} [\text{O}_2] + K_{\text{Q}_8\text{H}_2} [\text{Q}_8\text{H}_2] [\text{O}_2] + K_{\text{O}_2} [\text{Q}_8\text{H}_2]^2 + [\text{Q}_8\text{H}_2]^2 [\text{O}_2]}$ | $K_{\text{iq1}} K_{\text{mq2}} = 2.13 \times 10^{-10} \text{ M}^2$<br>$K_{\text{Q}_8\text{H}_2} = 4.2 \times 10^{-5} \text{ M}$<br>$K_{\text{O}_2} = 2.7 \times 10^{-7} \text{ M}$  | (24)<br>(24)<br>(22)   |
| 184 | “CYTbo_NO”   | $\text{Cyo} + \text{NO}\cdot \rightleftharpoons \text{Cyo}(\text{NO})$                                                                                                                                                                                                      | $k_{\text{on,NO}\cdot} = (3.4\text{--}13.6) \times 10^6 \text{ M}^{-1} \text{ s}^{-1} *$                                                                                            | (22)                   |
|     |              | $r = \frac{k_{\text{on,NO}\cdot} [\text{NO}\cdot] [\text{Cyo}]}{1 + \frac{[\text{O}_2]}{K_{\text{O}_2}}} - k_{\text{off,NO}\cdot} [\text{Cyo}(\text{NO})]$                                                                                                                  | $k_{\text{off,NO}\cdot} = 0.03 \text{ s}^{-1}$<br>$K_{\text{O}_2} = (6.05\text{--}60.5) \times 10^{-7} \text{ M} *$                                                                 | (22)<br>(22)           |
| 185 | “CYTbd_NO”   | $\text{Cyd} + \text{NO}\cdot \rightleftharpoons \text{Cyd}(\text{NO})$                                                                                                                                                                                                      | $k_{\text{on,NO}\cdot} = (1.9\text{--}7.6) \times 10^8 \text{ M}^{-1} \text{ s}^{-1} *$                                                                                             | (22)                   |
|     |              | $r = \frac{k_{\text{on,NO}\cdot} [\text{NO}\cdot] [\text{Cyd}]}{1 + \frac{[\text{O}_2]}{K_{\text{O}_2}}} - k_{\text{off,NO}\cdot} [\text{Cyd}(\text{NO})]$                                                                                                                  | $k_{\text{off,NO}\cdot} = 0.163 \text{ s}^{-1}$<br>$K_{\text{O}_2} = (2.7\text{--}27) \times 10^{-8} \text{ M} *$                                                                   | (22)<br>(22)           |

|     |               |                                                                                                                                                                                                                                                                                                                                                                                                                                                                                                                                                                                                                                      |                                                                                                                                                                                                                                                   |                                                         |
|-----|---------------|--------------------------------------------------------------------------------------------------------------------------------------------------------------------------------------------------------------------------------------------------------------------------------------------------------------------------------------------------------------------------------------------------------------------------------------------------------------------------------------------------------------------------------------------------------------------------------------------------------------------------------------|---------------------------------------------------------------------------------------------------------------------------------------------------------------------------------------------------------------------------------------------------|---------------------------------------------------------|
| 186 | “NDH1”        | $\text{NADH} + \text{Q}_8 + \text{H}^+ \xrightarrow{\text{NDH-1}} \text{NAD}^+ + \text{Q}_8\text{H}_2$                                                                                                                                                                                                                                                                                                                                                                                                                                                                                                                               | $k_{\text{cat}} = 50\text{--}600 \text{ s}^{-1} *$<br>$K_{\text{NADH}} = 7.2 \times 10^{-6} \text{ M}$<br>$K_{\text{d,Q8}} = 3.0 \times 10^{-5} \text{ M}$<br>$K_{\text{m,Q8}} = 3.0 \times 10^{-5} \text{ M}$                                    | (26,27) <sup>h</sup><br>(26)<br>(4,28)<br>(28)          |
|     |               | $r = \left( \frac{[P_{2\text{Fe}2\text{S}}(\text{holo})] + [P_{4\text{Fe}4\text{S}}(\text{holo})]}{[P_{\text{FeS,TOT}}]} \right) \left( \frac{k_{\text{cat}} [\text{NDH1}][\text{Q}_8][\text{NADH}]}{K_{\text{NADH}} K_{\text{d,Q8}} + K_{\text{NADH}} [\text{Q}_8] + K_{\text{m,Q8}} [\text{NADH}] + [\text{Q}_8][\text{NADH}]} \right)$<br>where:<br>$[P_{\text{FeS,TOT}}] = [P_{2\text{Fe}2\text{S}}(\text{holo})] + [P_{4\text{Fe}4\text{S}}(\text{holo})] + [P_{2\text{Fe}2\text{S}}(\text{DNIC})_2] + [P_{4\text{Fe}4\text{S}}(\text{RRE})_2] + [P_{2\text{Fe}2\text{S}}(\text{apo})] + [P_{4\text{Fe}4\text{S}}(\text{apo})]$ |                                                                                                                                                                                                                                                   |                                                         |
| 187 | “NDH2”        | $\text{NADH} + \text{Q}_8 + \text{H}^+ \xrightarrow{\text{NDH-2}} \text{NAD}^+ + \text{Q}_8\text{H}_2$                                                                                                                                                                                                                                                                                                                                                                                                                                                                                                                               | $k_{\text{cat}} = 17.1\text{--}474 \text{ s}^{-1} *$<br>$K_{\text{NADH}} = 5.7 \times 10^{-5} \text{ M}$<br>$K_{\text{d,Q8}} = 5.9 \times 10^{-6} \text{ M}$<br>$K_{\text{m,Q8}} = 5.9 \times 10^{-6} \text{ M}$                                  | (4,29,30)<br>(29)<br>(4,31)<br>(31)                     |
|     |               | $r = \left( \frac{k_{\text{cat}} [\text{NDH2}][\text{Q}_8][\text{NADH}]}{K_{\text{NADH}} K_{\text{d,Q8}} + K_{\text{NADH}} [\text{Q}_8] + K_{\text{m,Q8}} [\text{NADH}] + [\text{Q}_8][\text{NADH}]} \right)$                                                                                                                                                                                                                                                                                                                                                                                                                        |                                                                                                                                                                                                                                                   |                                                         |
| 188 | “NORVred”     | $\text{NorV}_{\text{ox}} + \text{NADH} \rightarrow \text{NorV}_{\text{red}} + \text{NAD}^+ + \text{H}^+$                                                                                                                                                                                                                                                                                                                                                                                                                                                                                                                             | $k_{\text{cat}} = 5.5 \times 10^6 \text{ M}^{-1} \text{ s}^{-1}$<br>$K_{\text{i,NO}\cdot} = 1.35 \times 10^{-5} \text{ M}$                                                                                                                        | (32)<br>(33)                                            |
|     |               | $r = \frac{k_{\text{cat}} [\text{NorV}_{\text{ox}}][\text{NADH}]}{1 + \frac{[\text{NO}\cdot]}{K_{\text{i,NO}\cdot}}}$                                                                                                                                                                                                                                                                                                                                                                                                                                                                                                                |                                                                                                                                                                                                                                                   |                                                         |
| 189 | “NORVno”      | $\text{NorV}_{\text{red}} + 2 \text{NO}\cdot + 2 \text{H}^+ \rightarrow \text{NorV}_{\text{ox}} + \text{N}_2\text{O} + \text{H}_2\text{O}$                                                                                                                                                                                                                                                                                                                                                                                                                                                                                           | $k_{\text{cat}} = 7.45 \text{ s}^{-1}$<br>$K_{\text{NO}\cdot} = (1\text{--}10) \times 10^{-7} \text{ M} *$                                                                                                                                        | (34)<br>(35,36)                                         |
|     |               | $r = \frac{k_{\text{cat}} [\text{NorV}_{\text{red}}][\text{NO}\cdot]}{K_{\text{NO}\cdot} + [\text{NO}\cdot]}$                                                                                                                                                                                                                                                                                                                                                                                                                                                                                                                        |                                                                                                                                                                                                                                                   |                                                         |
| 190 | “NRFAno”      | $\text{NO}\cdot + 6 \text{H}^+ + 2.5 \text{NADH} \xrightarrow{\text{NrfA}} \text{NH}_4^+ + \text{H}_2\text{O} + 2.5 \text{NAD}^+ + 2.5 \text{H}^+$                                                                                                                                                                                                                                                                                                                                                                                                                                                                                   | $k_{\text{cat}} = 390 \text{ s}^{-1}$<br>$K_{\text{NO}\cdot} = 3.0 \times 10^{-4} \text{ M}$                                                                                                                                                      | (37)<br>(38)                                            |
|     |               | $r = \frac{k_{\text{cat}} [\text{NrfA}][\text{NO}\cdot]}{K_{\text{NO}\cdot} + [\text{NO}\cdot]}$                                                                                                                                                                                                                                                                                                                                                                                                                                                                                                                                     |                                                                                                                                                                                                                                                   |                                                         |
| 191 | “HMP_transcr” | $\rightarrow \text{mRNA}_{\text{hmp}}$                                                                                                                                                                                                                                                                                                                                                                                                                                                                                                                                                                                               | $k_{\text{basal}} = (0\text{--}2.78) \times 10^{-12} \text{ M}\cdot\text{s}^{-1} *$<br>$k_{\text{max}} = (1.19\text{--}4.57) \times 10^{-10} \text{ M}\cdot\text{s}^{-1} *$<br>$K_{\text{NO}\cdot} = (1\text{--}1000) \times 10^{-8} \text{ M} *$ | (39-41) <sup>c</sup><br>(39-41)<br>(42,43) <sup>d</sup> |
|     |               | $r = k_{\text{basal}} + (k_{\text{max}} - k_{\text{basal}}) \frac{[\text{NO}\cdot]}{K_{\text{NO}\cdot} + [\text{NO}\cdot]}$                                                                                                                                                                                                                                                                                                                                                                                                                                                                                                          |                                                                                                                                                                                                                                                   |                                                         |

|     |                  |                          |                                                                                                                                                                                              |                                                                                                                                                                                                                           |                                            |
|-----|------------------|--------------------------|----------------------------------------------------------------------------------------------------------------------------------------------------------------------------------------------|---------------------------------------------------------------------------------------------------------------------------------------------------------------------------------------------------------------------------|--------------------------------------------|
| 192 | “NORV_transcr”   | → mRNA <sub>norV</sub>   | $r = k_{\text{basal}} + (k_{\text{max}} - k_{\text{basal}}) \frac{[\text{NO}\cdot]}{K_{\text{NO}\cdot} + [\text{NO}\cdot]}$                                                                  | $k_{\text{basal}} = (0-2.78) \times 10^{-12} \text{ M}\cdot\text{s}^{-1} *$<br>$k_{\text{max}} = (1.19-4.57) \times 10^{-10} \text{ M}\cdot\text{s}^{-1} *$<br>$K_{\text{NO}\cdot} = (1-1000) \times 10^{-8} \text{ M} *$ | (39-41)<br>(39-41)<br>(42,43) <sup>d</sup> |
| 193 | “NRFA_transcr”   | → mRNA <sub>nrfA</sub>   | $r = \frac{k_{\text{max}} K_{\text{O}_2} [\text{NO}_2^-]}{K_{\text{NO}_2^-} K_{\text{O}_2} + K_{\text{O}_2} [\text{NO}_2^-] + K_{\text{NO}_2^-} [\text{O}_2] + [\text{NO}_2^-][\text{O}_2]}$ | $k_{\text{max}} = (1.19-4.57) \times 10^{-10} \text{ M}\cdot\text{s}^{-1} *$<br>$K_{\text{NO}_2^-} = (1-1000) \times 10^{-6} \text{ M} *$<br>$K_{\text{O}_2} = (1-100) \times 10^{-12} \text{ M} *$                       | (39-41)<br>e<br>e                          |
| 194 | “HMP_translate”  | → Hmp <sub>FAD,Fe3</sub> | $r = k_{\text{Hmp-translate}} [\text{mRNA}_{\text{hmp}}] \left( 1 + \frac{k_{\text{act,O}_2} [\text{O}_2]}{K_{\text{O}_2} + [\text{O}_2]} \right)$                                           | $k_{\text{Hmp-translate}} = 0.057-1.49 \text{ s}^{-1} *$<br>$k_{\text{act,O}_2} = 0-10 *$<br>$K_{\text{O}_2} = 0-2.10 \times 10^{-4} \text{ M} *$                                                                         | (44-47)<br>f<br>(48) <sup>g</sup>          |
| 195 | “NORV_translate” | → NorV <sub>ox</sub>     | $r = k_{\text{NorV-translate}} [\text{mRNA}_{\text{norV}}] \left( 1 + \frac{k_{\text{act,O}_2} [\text{O}_2]}{K_{\text{O}_2} + [\text{O}_2]} \right)$                                         | $k_{\text{NorV-translate}} = 0.057-1.49 \text{ s}^{-1} *$<br>$k_{\text{act,O}_2} = 0-10 *$<br>$K_{\text{O}_2} = 0-2.10 \times 10^{-4} \text{ M} *$                                                                        | (44-47)<br>f<br>(48) <sup>g</sup>          |
| 196 | “NRFA_translate” | → NrfA                   | $r = k_{\text{NrfA-translate}} [\text{mRNA}_{\text{nrfA}}] \left( 1 + \frac{k_{\text{act,O}_2} [\text{O}_2]}{K_{\text{O}_2} + [\text{O}_2]} \right)$                                         | $k_{\text{NrfA-translate}} = 0.057-1.49 \text{ s}^{-1} *$<br>$k_{\text{act,O}_2} = 0-10 *$<br>$K_{\text{O}_2} = 0-2.10 \times 10^{-4} \text{ M} *$                                                                        | (44-47)<br>f<br>(48) <sup>g</sup>          |

a. For additional details on model reactions, rate expressions, and parameters, see ref (3) regarding the original model construction.

b. The O<sub>2</sub> mass transfer coefficient ( $k_{lA\text{O}_2}$ ) was measured in our experimental system (see *Supporting Methods* for additional details). This reaction takes place in “all” compartments (intracellular and extracellular).

c. The *hmp* basal transcription rate was restricted to  $\leq 10 \text{ nM/h}$  ( $2.78 \times 10^{-12} \text{ M/s}$ , approximately 100-fold less than the max. transcription rate), given the scarce levels of Hmp in untreated cells (49).

d. The NO• dissociation constant associated with activation of *hmp* and *norV* transcription was allowed to vary within the physiological range reported for NO• (nM to low  $\mu\text{M}$ ).

e. The constant governing NO<sub>2</sub><sup>-</sup> regulation of *nrfA* transcription was varied in the  $\mu\text{M}$  range, whereas the constant governing O<sub>2</sub>-mediated inhibition of transcription was assumed to be orders of magnitude lower given the anaerobic dependence of *nrfA* expression (50,51).

f. Assumed a maximum O<sub>2</sub>-mediated influence on translation of approximately one order of magnitude.

g. O<sub>2</sub> constant associated with translation activation was permitted to vary from zero to air-saturated O<sub>2</sub> concentration at 37°C (210  $\mu\text{M}$ ) (48).

h. Enzyme function was assumed to be affected by [Fe-S] damage. See ref (4) for additional details.

**Table S2.** AIC of optimal parameter sets for each optimization stage. The Akaike information criterion (AIC) calculated (see *Methods*, Main text) for the best-fit parameter set of each optimization stage is presented along with the corresponding number of optimized parameters (equivalent to  $k - 1$  in Equations 6 and 7, Main text), number of data points ( $n$ ), and sum of the squared residuals (SSR) between the measured and simulated [NO•] curves.

| Stage | SSR   | Optimized parameters | Data points | AIC   |
|-------|-------|----------------------|-------------|-------|
| 1     | 33.76 | 17                   | 1076        | -3688 |
| 2     | 29.19 | 136                  | 1076        | -3567 |
| 3     | 15.45 | 19                   | 1076        | -4525 |
| 4     | 10.48 | 23                   | 1076        | -4935 |

**Table S3.** Growth time at different O<sub>2</sub> concentrations. “Growth time” was quantified as the time required for a WT *E. coli* culture to grow from an initial OD<sub>600</sub> of 0.01 to an OD<sub>600</sub> of 0.20 in 20 mL of MOPS + 10 mM glucose in a 250 mL baffled shake flask at 37°C and 200 rpm. Times are listed as the mean ± SEM for at least 3 independent experiments. The O<sub>2</sub> concentration corresponds to the concentration of dissolved O<sub>2</sub> in cell-free media that was in equilibrium with that particular environment.

| [O <sub>2</sub> ] (μM) | Growth time (h) |
|------------------------|-----------------|
| 0                      | 7.31 ± 0.08     |
| 5                      | 5.60 ± 0.01     |
| 10                     | 5.27 ± 0.05     |
| 20                     | 5.02 ± 0.01     |
| 50                     | 5.07 ± 0.05     |

**Table S4.** Reaction deletion analysis of [NO•] oscillation dynamics. Shown is the minimal set of model reactions (name, description, and stoichiometric equation) necessary to (A) maintain sufficient quality-of-fit (ER < 10) relative to the full model, or (B) maintain [NO•] oscillations, for 50 μM DPTA treatment of WT culture at 5 μM O<sub>2</sub>.

(A) Minimal set of reactions necessary to maintain quality-of-fit (ER < 10).

| Reaction name       | Deletion eliminates oscillations* | Reaction description                          | Reaction equation                                                                                                                                     |
|---------------------|-----------------------------------|-----------------------------------------------|-------------------------------------------------------------------------------------------------------------------------------------------------------|
| EX_NOautox          | False                             | NO• autoxidation                              | $2 \text{NO}\bullet + \text{O}_2 \rightarrow 2 \text{NO}_2\bullet$                                                                                    |
| EX_NO_NO2r          | False                             | NO• reaction with NO <sub>2</sub> •           | $\text{NO}\bullet + \text{NO}_2\bullet \rightarrow \text{N}_2\text{O}_3$                                                                              |
| HMP1/2 <sup>†</sup> | True                              | Hmp reduction                                 | $\text{Hmp}(\text{FAD-Fe}^{3+}) + \text{NAD(P)H} + \text{H}^+ \rightarrow \text{Hmp}(\text{FADH}_2\text{-Fe}^{3+}) + \text{NAD(P)}^+$                 |
| HMP3                | True                              | Hmp electron transfer                         | $\text{Hmp}(\text{FADH}_2\text{-Fe}^{3+}) \rightarrow \text{Hmp}(\text{FADH}\bullet\text{-Fe}^{2+}) + \text{H}^+$                                     |
| HMP4                | True                              | Hmp O <sub>2</sub> binding                    | $\text{Hmp}(\text{FADH}\bullet\text{-Fe}^{2+}) + \text{O}_2 \rightarrow \text{Hmp}(\text{FADH}\bullet\text{-Fe}^{2+})\text{-O}_2$                     |
| HMP6                | True                              | Hmp-O <sub>2</sub> oxygenation of NO•         | $\text{Hmp}(\text{FADH}\bullet\text{-Fe}^{2+})\text{-O}_2 + \text{NO}\bullet \rightarrow \text{Hmp}(\text{FADH}\bullet\text{-Fe}^{3+})\text{-ONOO}^-$ |
| HMP7                | True                              | NO <sub>3</sub> <sup>-</sup> release from Hmp | $\text{Hmp}(\text{FADH}\bullet\text{-Fe}^{3+})\text{-ONOO}^- \rightarrow \text{Hmp}(\text{FADH}\bullet\text{-Fe}^{3+}) + \text{NO}_3^-$               |
| HMP8                | True                              | Hmp electron transfer                         | $\text{Hmp}(\text{FADH}\bullet\text{-Fe}^{3+}) \rightarrow \text{Hmp}(\text{FAD-Fe}^{2+}) + \text{H}^+$                                               |
| HMP9                | False                             | Hmp O <sub>2</sub> binding                    | $\text{Hmp}(\text{FAD-Fe}^{2+}) + \text{O}_2 \rightarrow \text{Hmp}(\text{FAD-Fe}^{2+})\text{-O}_2$                                                   |
| HMP11               | True                              | Hmp-O <sub>2</sub> oxygenation of NO•         | $\text{Hmp}(\text{FAD-Fe}^{2+})\text{-O}_2 + \text{NO}\bullet \rightarrow \text{Hmp}(\text{FAD-Fe}^{3+})\text{-ONOO}^-$                               |
| HMP12               | True                              | NO <sub>3</sub> <sup>-</sup> release from Hmp | $\text{Hmp}(\text{FAD-Fe}^{3+})\text{-ONOO}^- \rightarrow \text{Hmp}(\text{FAD-Fe}^{3+}) + \text{NO}_3^-$                                             |
| HMP13               | False                             | Hmp NO• binding                               | $\text{Hmp}(\text{FADH}\bullet\text{-Fe}^{2+}) + \text{NO}\bullet \rightarrow \text{Hmp}(\text{FADH}\bullet\text{-Fe}^{2+})\text{-NO}$                |
| HMP15               | True                              | Hmp NO• reduction                             | $\text{Hmp}(\text{FADH}\bullet\text{-Fe}^{2+})\text{-NO} \rightarrow \text{Hmp}(\text{FADH}\bullet\text{-Fe}^{3+}) + \text{NO}^-$                     |
| HMP16               | False                             | Hmp NO• binding                               | $\text{Hmp}(\text{FAD-Fe}^{2+}) + \text{NO}\bullet \rightarrow \text{Hmp}(\text{FAD-Fe}^{2+})\text{-NO}$                                              |
| HMP18               | True                              | Hmp NO• reduction                             | $\text{Hmp}(\text{FAD-Fe}^{2+})\text{-NO} \rightarrow \text{Hmp}(\text{FAD-Fe}^{3+}) + \text{NO}^-$                                                   |
| HMP20               | False                             | Hmp reduction                                 | $\text{Hmp}(\text{FAD-Fe}^{2+}) + \text{NADPH} + \text{H}^+ \rightarrow \text{Hmp}(\text{FADH}_2\text{-Fe}^{2+}) + \text{NADP}^+$                     |
| HMP21               | False                             | Hmp NO• binding                               | $\text{Hmp}(\text{FADH}_2\text{-Fe}^{2+}) + \text{NO}\bullet \rightarrow \text{Hmp}(\text{FADH}_2\text{-Fe}^{2+})\text{-NO}$                          |
| HMP23               | True                              | Hmp NO• reduction                             | $\text{Hmp}(\text{FADH}_2\text{-Fe}^{2+})\text{-NO} \rightarrow \text{Hmp}(\text{FADH}_2\text{-Fe}^{3+}) + \text{NO}^-$                               |
| HMP24               | True                              | Hmp O <sub>2</sub> binding                    | $\text{Hmp}(\text{FADH}_2\text{-Fe}^{2+}) + \text{O}_2 \rightarrow \text{Hmp}(\text{FADH}_2\text{-Fe}^{2+})\text{-O}_2$                               |
| HMP28               | True                              | Hmp-O <sub>2</sub> oxygenation of NO•         | $\text{Hmp}(\text{FADH}_2\text{-Fe}^{2+})\text{-O}_2 + \text{NO}\bullet \rightarrow \text{Hmp}(\text{FADH}_2\text{-Fe}^{3+})\text{-ONOO}^-$           |
| HMP29               | True                              | NO <sub>3</sub> <sup>-</sup> release from Hmp | $\text{Hmp}(\text{FADH}_2\text{-Fe}^{3+})\text{-ONOO}^- \rightarrow \text{Hmp}(\text{FADH}\bullet\text{-Fe}^{2+}) + \text{NO}_3^- + \text{H}^+$       |
| EX_NOdonor          | True                              | NONOate dissociation                          | $\text{NONOate} \rightarrow 2 \text{NO}\bullet$                                                                                                       |
| EX_NOout            | True                              | NO• loss to gas phase                         | $\text{NO}\bullet \rightarrow \text{gas}$                                                                                                             |
| hmpFe2h_deg         | False                             | Hmp degradation                               | $\text{Hmp}(\text{FADH}\bullet\text{-Fe}^{2+}) \rightarrow$                                                                                           |
| hmpFe2h2_deg        | False                             | Hmp degradation                               | $\text{Hmp}(\text{FADH}_2\text{-Fe}^{2+}) \rightarrow$                                                                                                |
| hmpFe2h_o2_deg      | False                             | Hmp degradation                               | $\text{Hmp}(\text{FADH}\bullet\text{-Fe}^{2+})\text{-O}_2 \rightarrow \text{O}_2$                                                                     |
| hmpFe2h2_o2_deg     | False                             | Hmp degradation                               | $\text{Hmp}(\text{FADH}_2\text{-Fe}^{2+})\text{-O}_2 \rightarrow \text{O}_2$                                                                          |

|                           |                   |                                                            |                                                                                                                                              |
|---------------------------|-------------------|------------------------------------------------------------|----------------------------------------------------------------------------------------------------------------------------------------------|
| hmpFe2_no_deg             | False             | Hmp degradation                                            | $\text{Hmp}(\text{FAD-Fe}^{2+})\text{-NO} \rightarrow \text{NO}\bullet$                                                                      |
| hmpFe2h_no_deg            | False             | Hmp degradation                                            | $\text{Hmp}(\text{FADH}\bullet\text{-Fe}^{2+})\text{-NO} \rightarrow \text{NO}\bullet$                                                       |
| hmpFe2h2_no_deg           | False             | Hmp degradation                                            | $\text{Hmp}(\text{FADH}_2\text{-Fe}^{2+})\text{-NO} \rightarrow \text{NO}\bullet$                                                            |
| norVred_o2                | True <sup>‡</sup> | O <sub>2</sub> -mediated NorV inactivation                 | $\text{NorV}_{\text{red}} + \text{O}_2 \rightarrow$                                                                                          |
| CYTbo_NO                  | True              | Cytochrome <i>bo</i> NO• binding                           | $\text{NO}\bullet + \text{Cytbo} \leftrightarrow \text{Cytbo-NO}$                                                                            |
| CYTbd_NO                  | True              | Cytochrome <i>bd</i> NO• binding                           | $\text{NO}\bullet + \text{Cytbd} \leftrightarrow \text{Cytbd-NO}$                                                                            |
| NORVred                   | False             | NorV reduction                                             | $\text{NorV}_{\text{ox}} + \text{NADH} \rightarrow \text{NorV}_{\text{red}} + \text{NAD}^+ + \text{H}^+$                                     |
| NORVno                    | False             | NorV NO• reduction                                         | $\text{NorV}_{\text{red}} + 2 \text{NO}\bullet + 2 \text{H}^+ \rightarrow \text{NorV}_{\text{ox}} + \text{N}_2\text{O} + \text{H}_2\text{O}$ |
| EX_O2gas                  | True              | O <sub>2</sub> transfer with gas phase                     | $\text{O}_{2,\text{gas}} \leftrightarrow \text{O}_2$                                                                                         |
| HMP_translate             | True              | Hmp translation                                            | $\rightarrow \text{Hmp}(\text{FAD-Fe}^{3+})$                                                                                                 |
| NORV_translate            | False             | NorV translation                                           | $\rightarrow \text{NorV}_{\text{ox}}$                                                                                                        |
| CYTbo_resp                | False             | Cytochrome <i>bo</i> O <sub>2</sub> reduction              | $\text{O}_2 + 2 \text{Q}_8\text{H}_2 \rightarrow 2 \text{H}_2\text{O} + 2 \text{Q}_8$                                                        |
| CYTbd_resp                | True              | Cytochrome <i>bd</i> O <sub>2</sub> reduction              | $\text{O}_2 + 2 \text{Q}_8\text{H}_2 \rightarrow 2 \text{H}_2\text{O} + 2 \text{Q}_8$                                                        |
| NDH1                      | True              | NADH dehydrogenase I quinone reduction                     | $\text{NADH} + \text{Q}_8 + \text{H}^+ \rightarrow \text{NAD}^+ + \text{Q}_8\text{H}_2$                                                      |
| HMP_transcr               | True              | <i>hmp</i> transcription                                   | $\rightarrow \text{mRNA}_{\text{hmp}}$                                                                                                       |
| RNA_hmp_deg               | True              | <i>mRNA<sub>hmp</sub></i> degradation                      | $\text{mRNA}_{\text{hmp}} \rightarrow$                                                                                                       |
| NORV_transcr              | False             | <i>norV</i> transcription                                  | $\rightarrow \text{mRNA}_{\text{norV}}$                                                                                                      |
| RNA_norV_deg              | True <sup>‡</sup> | <i>mRNA<sub>norV</sub></i> degradation                     | $\text{mRNA}_{\text{norV}} \rightarrow$                                                                                                      |
| <b>All Hmp reactions</b>  | True              | (all reactions associated with Hmp)                        | --                                                                                                                                           |
| <b>All CYT reactions</b>  | True              | (all reactions associated with Cyt <i>bo</i> & <i>bd</i> ) | --                                                                                                                                           |
| <b>All NorV reactions</b> | False             | (all reactions associated with NorV)                       | --                                                                                                                                           |

\* Reactions from this minimal set were deleted individually (or in groups of all Hmp-, CYT-, and NorV-related reactions), and the resulting simulated [NO•] curve (at 5 μM O<sub>2</sub>) was visually inspected to determine whether oscillations were eliminated (“True”) or remained (“False”).

<sup>†</sup> A second minimal set of reactions was identified, and was identical as the set presented here, except HMP1 was substituted for HMP2, where the reaction involved a reduction of Hmp by NADPH instead of NADH.

<sup>‡</sup> Two NorV-related reactions eliminated oscillations when deleted individually (“norVred\_o2” and “RNA\_norV\_deg”), but had no effect on oscillations when deleted simultaneously with all other NorV-related reactions.

(B) Minimal set of reactions necessary to maintain [NO•] oscillations.

| Reaction name       | Reaction description                          | Reaction equation                                                                                                                               |
|---------------------|-----------------------------------------------|-------------------------------------------------------------------------------------------------------------------------------------------------|
| HMP1/2 <sup>†</sup> | Hmp reduction                                 | $\text{Hmp}(\text{FAD-Fe}^{3+}) + \text{NAD(P)H} + \text{H}^+ \rightarrow \text{Hmp}(\text{FADH}_2\text{-Fe}^{3+}) + \text{NAD(P)}^+$           |
| HMP3                | Hmp electron transfer                         | $\text{Hmp}(\text{FADH}_2\text{-Fe}^{3+}) \rightarrow \text{Hmp}(\text{FADH}\cdot\text{-Fe}^{2+}) + \text{H}^+$                                 |
| HMP4                | Hmp O <sub>2</sub> binding                    | $\text{Hmp}(\text{FADH}\cdot\text{-Fe}^{2+}) + \text{O}_2 \rightarrow \text{Hmp}(\text{FADH}\cdot\text{-Fe}^{2+})\text{-O}_2$                   |
| HMP6                | Hmp-O <sub>2</sub> oxygenation of NO•         | $\text{Hmp}(\text{FADH}\cdot\text{-Fe}^{2+})\text{-O}_2 + \text{NO}\cdot \rightarrow \text{Hmp}(\text{FADH}\cdot\text{-Fe}^{3+})\text{-ONOO}^-$ |
| HMP7                | NO <sub>3</sub> <sup>-</sup> release from Hmp | $\text{Hmp}(\text{FADH}\cdot\text{-Fe}^{3+})\text{-ONOO}^- \rightarrow \text{Hmp}(\text{FADH}\cdot\text{-Fe}^{3+}) + \text{NO}_3^-$             |
| HMP8                | Hmp electron transfer                         | $\text{Hmp}(\text{FADH}\cdot\text{-Fe}^{3+}) \rightarrow \text{Hmp}(\text{FAD-Fe}^{2+}) + \text{H}^+$                                           |
| HMP11               | Hmp-O <sub>2</sub> oxygenation of NO•         | $\text{Hmp}(\text{FAD-Fe}^{2+})\text{-O}_2 + \text{NO}\cdot \rightarrow \text{Hmp}(\text{FAD-Fe}^{3+})\text{-ONOO}^-$                           |
| HMP12               | NO <sub>3</sub> <sup>-</sup> release from Hmp | $\text{Hmp}(\text{FAD-Fe}^{3+})\text{-ONOO}^- \rightarrow \text{Hmp}(\text{FAD-Fe}^{3+}) + \text{NO}_3^-$                                       |
| HMP15               | Hmp NO• reduction                             | $\text{Hmp}(\text{FADH}\cdot\text{-Fe}^{2+})\text{-NO} \rightarrow \text{Hmp}(\text{FADH}\cdot\text{-Fe}^{3+}) + \text{NO}^-$                   |
| HMP18               | Hmp NO• reduction                             | $\text{Hmp}(\text{FAD-Fe}^{2+})\text{-NO} \rightarrow \text{Hmp}(\text{FAD-Fe}^{3+}) + \text{NO}^-$                                             |
| HMP23               | Hmp NO• reduction                             | $\text{Hmp}(\text{FADH}_2\text{-Fe}^{2+})\text{-NO} \rightarrow \text{Hmp}(\text{FADH}_2\text{-Fe}^{3+}) + \text{NO}^-$                         |
| HMP24               | Hmp O <sub>2</sub> binding                    | $\text{Hmp}(\text{FADH}_2\text{-Fe}^{2+}) + \text{O}_2 \rightarrow \text{Hmp}(\text{FADH}_2\text{-Fe}^{2+})\text{-O}_2$                         |
| HMP28               | Hmp-O <sub>2</sub> oxygenation of NO•         | $\text{Hmp}(\text{FADH}_2\text{-Fe}^{2+})\text{-O}_2 + \text{NO}\cdot \rightarrow \text{Hmp}(\text{FADH}_2\text{-Fe}^{3+})\text{-ONOO}^-$       |
| HMP29               | NO <sub>3</sub> <sup>-</sup> release from Hmp | $\text{Hmp}(\text{FADH}_2\text{-Fe}^{3+})\text{-ONOO}^- \rightarrow \text{Hmp}(\text{FADH}\cdot\text{-Fe}^{2+}) + \text{NO}_3^- + \text{H}^+$   |
| EX_NOdonor          | NONOate dissociation                          | $\text{NONOate} \rightarrow 2 \text{NO}\cdot$                                                                                                   |
| EX_NOout            | NO• loss to gas phase                         | $\text{NO}\cdot \rightarrow \textit{gas}$                                                                                                       |
| CYTbo_NO            | Cytochrome <i>bo</i> NO• binding              | $\text{NO}\cdot + \textit{Cytbo} \leftrightarrow \textit{Cytbo}\text{-NO}$                                                                      |
| CYTbd_NO            | Cytochrome <i>bd</i> NO• binding              | $\text{NO}\cdot + \textit{Cytbd} \leftrightarrow \textit{Cytbd}\text{-NO}$                                                                      |
| EX_O2gas            | O <sub>2</sub> transfer with gas phase        | $\text{O}_{2,\text{gas}} \leftrightarrow \text{O}_2$                                                                                            |
| HMP_translate       | Hmp translation                               | $\rightarrow \text{Hmp}(\text{FAD-Fe}^{3+})$                                                                                                    |
| CYTbd_resp          | Cytochrome <i>bd</i> O <sub>2</sub> reduction | $\text{O}_2 + 2 \text{Q}_8\text{H}_2 \rightarrow 2 \text{H}_2\text{O} + 2 \text{Q}_8$                                                           |
| NDH1                | NADH dehydrogenase I quinone reduction        | $\text{NADH} + \text{Q}_8 + \text{H}^+ \rightarrow \text{NAD}^+ + \text{Q}_8\text{H}_2$                                                         |
| HMP_transcr         | <i>hmp</i> transcription                      | $\rightarrow \text{mRNA}_{\textit{hmp}}$                                                                                                        |
| RNA_hmp_deg         | <i>mRNA</i> <sub><i>hmp</i></sub> degradation | $\text{mRNA}_{\textit{hmp}} \rightarrow$                                                                                                        |

<sup>†</sup> A second minimal set of reactions was identified, and was identical as the set presented here, except HMP1 was substituted for HMP2, where the reaction involved a reduction of Hmp by NADPH instead of NADH.



**Table S5.** Primers used for cPCR confirmation of genetic deletions. Each deletion was confirmed with colony PCR (cPCR) using two primer sets: (1) a forward and reverse primer within the coding sequence of the deleted gene, and (2) a forward primer upstream of the deleted gene and a reverse primer within the kan<sup>R</sup> coding sequence (for mutations with kan<sup>R</sup> cassette in place of the gene), or a forward and reverse primer upstream and downstream (respectively) of the deleted gene (for mutations from which kan<sup>R</sup> had been cured).

| Primer sequence (5' → 3')      | Gene             | Description                                        |
|--------------------------------|------------------|----------------------------------------------------|
| CCGAATCATTGTGCGATAACA          | <i>hmp</i>       | Forward primer, upstream of the <i>hmp</i> gene    |
| GCAAAATCGGTGACGGTAAA           |                  | Reverse primer, downstream of the <i>hmp</i> gene  |
| TCCCTTTACTGGTGAAACG            |                  | Forward primer, within the <i>hmp</i> gene         |
| CACGCCAGATCCACTAACT            |                  | Reverse primer, within the <i>hmp</i> gene         |
| CCAGCACATCAACGGAAAAA           | <i>norV</i>      | Forward primer, upstream of the <i>norV</i> gene   |
| GACTGGGAAGTGC GTGATTT          |                  | Forward primer, within the <i>norV</i> gene        |
| CGGAAGCGTAAACCAGTCAT           |                  | Reverse primer, within the <i>norV</i> gene        |
| TTTCTCATCACCCAGTTGTC ACTCTAA   | <i>cyoA</i>      | Forward primer, upstream of the <i>cyoA</i> gene   |
| GAGGTCAGCCACTCTTTCCA           |                  | Reverse primer, downstream of the <i>cyoA</i> gene |
| ATGAGACTCAGGAAATACAATAAAAGTTTG |                  | Forward primer, within the <i>cyoA</i> gene        |
| GTCCATGCCTTCCATACCTTC          |                  | Reverse primer, within the <i>cyoA</i> gene        |
| ATGCAGAAATATGCCCGTCT           | <i>appB</i>      | Forward primer, upstream of the <i>appB</i> gene   |
| GTGTCAGCCAACCCAGTTTT           |                  | Reverse primer, downstream of the <i>appB</i> gene |
| GATGATGAACGCCGGATAGT           |                  | Forward primer, within the <i>appB</i> gene        |
| TACGGCGGAGAGTTTCTGTT           |                  | Reverse primer, within the <i>appB</i> gene        |
| TGGCTTCCTGCTTCTGGCAA           | <i>cydB</i>      | Forward primer, upstream of the <i>cydB</i> gene   |
| TCTGCTGATTGGTTTTGCAG           |                  | Forward primer, within the <i>cydB</i> gene        |
| CATACGTGCAGTCAGGATGG           |                  | Reverse primer, within the <i>cydB</i> gene        |
| ATGATGGATACTTTCTCGGCAGGAG      | kan <sup>R</sup> | Reverse primer, within the kan <sup>R</sup> gene   |

**Table S6.** Training of respiratory module. Parameters involved in O<sub>2</sub> respiration were trained on [O<sub>2</sub>] measurements of exponential-phase WT *E. coli* cultures growing in an environment of 50 μM O<sub>2</sub> (SI Appendix, Supporting Methods and Fig. S14B). Values were permitted to vary within bounds (min and max), for which reference(s) are provided. Optimal values were the parameter set yielding the minimum SSR.

| #  | Parameter                                     | Parameter description/reaction involved                 | Min.                  | Max.                  | Units           | Ref.                | Optimal               |
|----|-----------------------------------------------|---------------------------------------------------------|-----------------------|-----------------------|-----------------|---------------------|-----------------------|
| 1  | $k_{\text{Cy}o,\text{cat}}$                   | Cytochrome <i>bo</i> terminal oxidase; $k_{\text{cat}}$ | 18.3                  | 150                   | s <sup>-1</sup> | (21-23)             | 125                   |
| 2  | $k_{\text{C}y\text{d},\text{cat}}$            | Cytochrome <i>bd</i> terminal oxidase; $k_{\text{cat}}$ | 12                    | 469                   | s <sup>-1</sup> | (21,22,24)          | 460                   |
| 3  | $k_{\text{NDH}1,\text{cat}}$                  | NADH dehydrogenase I; $k_{\text{cat}}$                  | 50                    | 600                   | s <sup>-1</sup> | (26,27)             | 498                   |
| 4  | $k_{\text{NDH}2,\text{cat}}$                  | NADH dehydrogenase II; $k_{\text{cat}}$                 | 17.1                  | 474                   | s <sup>-1</sup> | (29,30)             | 438                   |
| 5  | [Cy <sub>o</sub> ] <sub>0</sub>               | Initial concentration of cytochrome <i>bo</i>           | $1.58 \times 10^{-8}$ | $1.58 \times 10^{-6}$ | M               | (52) <sup>a</sup>   | $1.33 \times 10^{-6}$ |
| 6  | [C <sub>yd</sub> ] <sub>0</sub>               | Initial concentration of cytochrome <i>bd</i>           | $1.06 \times 10^{-8}$ | $1.06 \times 10^{-6}$ | M               | (52) <sup>a</sup>   | $1.04 \times 10^{-6}$ |
| 7  | [Q <sub>8</sub> ] <sub>0</sub>                | Initial concentration of ubiquinone-8                   | $4.48 \times 10^{-5}$ | $4.48 \times 10^{-3}$ | M               | (53) <sup>a,b</sup> | $3.71 \times 10^{-3}$ |
| 8  | [Q <sub>8</sub> H <sub>2</sub> ] <sub>0</sub> | Initial concentration of ubiquinol-8                    | $4.48 \times 10^{-5}$ | $4.48 \times 10^{-3}$ | M               | (53) <sup>a,b</sup> | $2.72 \times 10^{-4}$ |
| 9  | [NDH1] <sub>0</sub>                           | Initial concentration of NADH dehydrogenase I           | $2.70 \times 10^{-8}$ | $2.70 \times 10^{-6}$ | M               | (47) <sup>a</sup>   | $2.21 \times 10^{-6}$ |
| 10 | [NDH2] <sub>0</sub>                           | Initial concentration of NADH dehydrogenase II          | $3.05 \times 10^{-9}$ | $3.05 \times 10^{-7}$ | M               | (54) <sup>a</sup>   | $1.19 \times 10^{-7}$ |

a. The concentration of biomolecules were permitted to vary within an order of magnitude of the reported value. Concentrations were converted from molecules/cell to molar assuming a cell volume of  $3.2 \times 10^{-15}$  L (55).

b. ubiquinone and ubiquinol concentrations were converted from μmol/g dry cell weight (53) to molar assuming cell density of 448 gDW/L (47).

## SUPPORTING REFERENCES

1. Adolfsen KJ, Brynildsen MP (2015) A Kinetic Platform to Determine the Fate of Hydrogen Peroxide in *Escherichia coli*. *PLoS Comput Biol* 11(11):e1004562.
2. Zamora-Sillero E, Hafner M, Ibig A, Stelling J, Wagner A (2011) Efficient characterization of high-dimensional parameter spaces for systems biology. *BMC Syst Biol* 5:142.
3. Robinson JL, Brynildsen MP (2013) A Kinetic Platform to Determine the Fate of Nitric Oxide in *Escherichia coli*. *PLoS Comput Biol* 9(5):e1003049.
4. Robinson JL, Miller RV, Brynildsen MP (2014) Model-driven identification of dosing regimens that maximize the antimicrobial activity of nitric oxide. *Metab Eng Commun* 1:12-18.
5. Urbina HD, Silberg JJ, Hoff KG, Vickery LE (2001) Transfer of sulfur from IscS to IscU during Fe/S cluster assembly. *J Biol Chem* 276(48):44521-44526.
6. Prischi F, *et al.* (2010) Structural bases for the interaction of frataxin with the central components of iron-sulphur cluster assembly. *Nat Commun* 1:95.
7. Bonomi F, Iametti S, Ta D, Vickery LE (2005) Multiple turnover transfer of [2Fe2S] clusters by the iron-sulfur cluster assembly scaffold proteins IscU and IscA. *J Biol Chem* 280(33):29513-29518.
8. Terato H, *et al.* (2002) Novel repair activities of AlkA (3-methyladenine DNA glycosylase II) and endonuclease VIII for xanthine and oxanine, guanine lesions induced by nitric oxide and nitrous acid. *Nucleic Acids Res* 30(22):4975-4984.
9. Zhao B, O'Brien PJ (2011) Kinetic mechanism for the excision of hypoxanthine by *Escherichia coli* AlkA and evidence for binding to DNA ends. *Biochemistry* 50(20):4350-4359.
10. Wong I, Lundquist AJ, Bernards AS, Mosbaugh DW (2002) Presteady-state analysis of a single catalytic turnover by *Escherichia coli* uracil-DNA glycosylase reveals a "pinch-pull-push" mechanism. *J Biol Chem* 277(22):19424-19432.
11. Stivers JT, Pankiewicz KW, Watanabe KA (1999) Kinetic mechanism of damage site recognition and uracil flipping by *Escherichia coli* uracil DNA glycosylase. *Biochemistry* 38(3):952-963.
12. Faure V, Saparbaev M, Dumy P, Constant JF (2005) Action of multiple base excision repair enzymes on the 2'-deoxyribonolactone. *Biochem Biophys Res Commun* 328(4):1188-1195.
13. McClure WR, Jovin TM (1975) The steady state kinetic parameters and non-processivity of *Escherichia coli* deoxyribonucleic acid polymerase I. *J Biol Chem* 250(11):4073-4080.
14. Bertram JG, Oertell K, Petruska J, Goodman MF (2010) DNA polymerase fidelity: comparing direct competition of right and wrong dNTP substrates with steady state and pre-steady state kinetics. *Biochemistry* 49(1):20-28.
15. Lehman IR (1974) DNA ligase: structure, mechanism, and function. *Science* 186(4166):790-797.
16. Liu L, *et al.* (2001) A metabolic enzyme for S-nitrosothiol conserved from bacteria to humans. *Nature* 410(6827):490-494.
17. Scrutton NS, Deonarain MP, Berry A, Perham RN (1992) Cooperativity Induced by a Single Mutation at the Subunit Interface of a Dimeric Enzyme - Glutathione-Reductase. *Science* 258(5085):1140-1143.

18. Carlberg I, Mannervik B (1975) Purification and characterization of the flavoenzyme glutathione reductase from rat liver. *J Biol Chem* 250(14):5475-5480.
19. Mulrooney SB (1997) Application of a single-plasmid vector for mutagenesis and high-level expression of thioredoxin reductase and its use to examine flavin cofactor incorporation. *Protein Express Purif* 9(3):372-378.
20. Sengupta R, *et al.* (2007) Thioredoxin catalyzes the denitrosation of low-molecular mass and protein S-nitrosothiols. *Biochemistry* 46(28):8472-8483.
21. Rice CW, Hempfling WP (1978) Oxygen-limited continuous culture and respiratory energy conservation in *Escherichia coli*. *J Bacteriol* 134(1):115-124.
22. Mason MG, *et al.* (2009) Cytochrome bd confers nitric oxide resistance to *Escherichia coli*. *Nat Chem Biol* 5(2):94-96.
23. Bolgiano B, Salmon I, Poole RK (1993) Reactions of the membrane-bound cytochrome bo terminal oxidase of *Escherichia coli* with carbon monoxide and oxygen. *Biochim Biophys Acta* 1141(1):95-104.
24. Junemann S, Butterworth PJ, Wrigglesworth JM (1995) A suggested mechanism for the catalytic cycle of cytochrome bd terminal oxidase based on kinetic analysis. *Biochemistry* 34(45):14861-14867.
25. Yap LL, *et al.* (2010) The quinone-binding sites of the cytochrome bo<sub>3</sub> ubiquinol oxidase from *Escherichia coli*. *Biochim Biophys Acta* 1797(12):1924-1932.
26. Verkhovskaya ML, Belevich N, Euro L, Wikstrom M, Verkhovsky MI (2008) Real-time electron transfer in respiratory complex I. *Proc Natl Acad Sci U S A* 105(10):3763-3767.
27. Leif H, Sled VD, Ohnishi T, Weiss H, Friedrich T (1995) Isolation and characterization of the proton-translocating NADH: ubiquinone oxidoreductase from *Escherichia coli*. *Eur J Biochem* 230(2):538-548.
28. David P, Baumann M, Wikstrom M, Finel M (2002) Interaction of purified NDH-1 from *Escherichia coli* with ubiquinone analogues. *Biochim Biophys Acta* 1553(3):268-278.
29. Jaworowski A, Campbell HD, Poulis MI, Young IG (1981) Genetic identification and purification of the respiratory NADH dehydrogenase of *Escherichia coli*. *Biochemistry* 20(7):2041-2047.
30. Villegas JM, Volentini SI, Rintoul MR, Rapisarda VA (2011) Amphipathic C-terminal region of *Escherichia coli* NADH dehydrogenase-2 mediates membrane localization. *Arch Biochem Biophys* 505(2):155-159.
31. Bjorklof K, Zickermann V, Finel M (2000) Purification of the 45 kDa, membrane bound NADH dehydrogenase of *Escherichia coli* (NDH-2) and analysis of its interaction with ubiquinone analogues. *FEBS Lett* 467(1):105-110.
32. Vicente JB, *et al.* (2007) Kinetics of electron transfer from NADH to the *Escherichia coli* nitric oxide reductase flavorubredoxin. *FEBS J* 274(3):677-686.
33. Girsch P, deVries S (1997) Purification and initial kinetic and spectroscopic characterization of NO reductase from *Paracoccus denitrificans*. *Biochim Biophys Acta* 1318(1-2):202-216.
34. Gomes CM, *et al.* (2002) A novel type of nitric-oxide reductase. *Escherichia coli* flavorubredoxin. *J Biol Chem* 277(28):25273-25276.
35. Gardner AM, Helmick RA, Gardner PR (2002) Flavorubredoxin, an inducible catalyst for nitric oxide reduction and detoxification in *Escherichia coli*. *J Biol Chem* 277(10):8172-8177.

36. Vicente JB, *et al.* (2008) Kinetic characterization of the *Escherichia coli* nitric oxide reductase flavorubredoxin. *Methods Enzymol* 437:47-62.
37. Poock SR, Leach ER, Moir JW, Cole JA, Richardson DJ (2002) Respiratory detoxification of nitric oxide by the cytochrome c nitrite reductase of *Escherichia coli*. *J Biol Chem* 277(26):23664-23669.
38. van Wonderen JH, Burlat B, Richardson DJ, Cheesman MR, Butt JN (2008) The nitric oxide reductase activity of cytochrome c nitrite reductase from *Escherichia coli*. *J Biol Chem* 283(15):9587-9594.
39. Kennell D, Riezman H (1977) Transcription and translation initiation frequencies of the *Escherichia coli lac* operon. *J Mol Biol* 114(1):1-21.
40. Liang S, *et al.* (1999) Activities of constitutive promoters in *Escherichia coli*. *J Mol Biol* 292(1):19-37.
41. So LH, *et al.* (2011) General properties of transcriptional time series in *Escherichia coli*. *Nat Genet* 43(6):554-560.
42. Allen BW, Liu J, Piantadosi CA (2005) Electrochemical detection of nitric oxide in biological fluids. *Methods Enzymol* 396:68-77.
43. Wang C, Trudel LJ, Wogan GN, Deen WM (2003) Thresholds of nitric oxide-mediated toxicity in human lymphoblastoid cells. *Chem Res Toxicol* 16(8):1004-1013.
44. Bieling P, Beringer M, Adio S, Rodnina MV (2006) Peptide bond formation does not involve acid-base catalysis by ribosomal residues. *Nat Struct Mol Biol* 13(5):423-428.
45. Johansson M, Bouakaz E, Lovmar M, Ehrenberg M (2008) The kinetics of ribosomal peptidyl transfer revisited. *Mol Cell* 30(5):589-598.
46. Liang ST, Xu YC, Dennis P, Bremer H (2000) mRNA composition and control of bacterial gene expression. *J Bacteriol* 182(11):3037-3044.
47. Sundararaj S, *et al.* (2004) The CyberCell Database (CCDB): a comprehensive, self-updating, relational database to coordinate and facilitate in silico modeling of *Escherichia coli*. *Nucleic Acids Res* 32(Database issue):D293-295.
48. Montgomery HAC, Thom NS, Cockburn A (1964) Determination of dissolved oxygen by the winkler method and the solubility of oxygen in pure water and sea water. *J Appl Chem* 14(7):280-296.
49. Poole RK, *et al.* (1996) Nitric oxide, nitrite, and Fnr regulation of *hmp* (flavo-hemoglobin) gene expression in *Escherichia coli* K-12. *J Bacteriol* 178(18):5487-5492.
50. Browning DF, Lee DJ, Spiro S, Busby SJ (2010) Down-regulation of the *Escherichia coli* K-12 *nrf* promoter by binding of the NsrR nitric oxide-sensing transcription repressor to an upstream site. *J Bacteriol* 192(14):3824-3828.
51. Spiro S (2006) Nitric oxide-sensing mechanisms in *Escherichia coli*. *Biochem Soc Trans* 34(Pt 1):200-202.
52. Cotter PA, Chepuri V, Gennis RB, Gunsalus RP (1990) Cytochrome *o* (*cyoABCDE*) and *d* (*cydAB*) Oxidase Gene Expression in *Escherichia coli* Is Regulated by Oxygen, pH, and the *fnr* Gene Product. *J Bacteriol* 172(11):6333-6338.
53. Bekker M, *et al.* (2007) Changes in the redox state and composition of the quinone pool of *Escherichia coli* during aerobic batch-culture growth. *Microbiology* 153(Pt 6):1974-1980.
54. Taniguchi Y, *et al.* (2010) Quantifying *E. coli* proteome and transcriptome with single-molecule sensitivity in single cells. *Science* 329(5991):533-538.

55. Volkmer B, Heinemann M (2011) Condition-dependent cell volume and concentration of *Escherichia coli* to facilitate data conversion for systems biology modeling. *PLoS One* 6(7):e23126.
